# Supplementary material for: Design, Synthesis, Docking Study, and Antiproliferative Evaluation of Novel Schiff Base–Benzimidazole Hybrids with VEGFR-2 Inhibitory Activity
Source: MDPI journal article supplement (doi:10.3390/molecules28020481), 2023-01-04
Supplement: s1 [file s1]

## **Supporting Information**

Article

### **Design, Synthesis, Docking Study, and Antiproliferative Evaluation of Novel Schiff Base-Benzimidazole Hybrids with VEGFR-2 Inhibitory Activity**

**Hany M. Abd El-Lateef <sup>1,2,\*</sup>, Mohammed A. I. Elbastawesy <sup>3,\*</sup>, Tamer Mohamed Abdelghani Ibrahim <sup>4,5</sup>, Mai M. Khalaf <sup>1,2</sup>, Mohamed Gouda <sup>1</sup>, Mariam G. F. Wahba <sup>6</sup>, Islam Zaki <sup>7</sup> and Martha M. Morcoss <sup>8</sup>**

- <sup>1</sup> Department of Chemistry, College of Science, King Faisal University, Al-Ahsa 31982, Saudi Arabia; [mmkali@kfu.edu.sa](mailto:mmkali@kfu.edu.sa) (M.M.K.); [mgoudaam@kfu.edu.sa](mailto:mgoudaam@kfu.edu.sa) (M.G.)
- <sup>2</sup> Department of Chemistry, Faculty of Science, Sohag University, Sohag 82524, Egypt
- <sup>3</sup> Department of Pharmaceutical Organic Chemistry, Faculty of Pharmacy, Al-Azhar University, Assiut 71524, Egypt
- <sup>4</sup> Community Engagement Development Administration, Vice-Presidency for Studies, Development and Community Service, King Faisal University, Al-Ahsa 31982, Saudi Arabia; [tabdelghani@kfu.edu.sa](mailto:tabdelghani@kfu.edu.sa)
- <sup>5</sup> Faculty of Social Work, Helwan University, Helwan 11795, Egypt, [tamer\\_abdelghani@social.helwan.edu.eg](mailto:tamer_abdelghani@social.helwan.edu.eg)
- <sup>6</sup> Department of Pharmacology and Toxicology, Faculty of pharmacy, Nahda University, Beni-Suef 62513, Egypt; [mariam.gamal@nub.edu.eg](mailto:mariam.gamal@nub.edu.eg)
- <sup>7</sup> Pharmaceutical Organic Chemistry Department, Faculty of Pharmacy, Port Said University, Port Said 42526, Egypt; [eslam.zaki@pharm.psu.edu.eg](mailto:eslam.zaki@pharm.psu.edu.eg)
- <sup>8</sup> Department of Pharmaceutical Chemistry, Faculty of Pharmacy, Nahda University, Beni-Suef 62513, Egypt; [martha.moheb@nub.edu.eg](mailto:martha.moheb@nub.edu.eg)
- \* Correspondence: [hmahmed@kfu.edu.sa](mailto:hmahmed@kfu.edu.sa) (H.M.A.E.-L.); [mohamedali.pharm.ast@azhar.edu.eg](mailto:mohamedali.pharm.ast@azhar.edu.eg) (M.A.I.E.); Tel.: +20-100-429-2549 (M.A.I.E.)

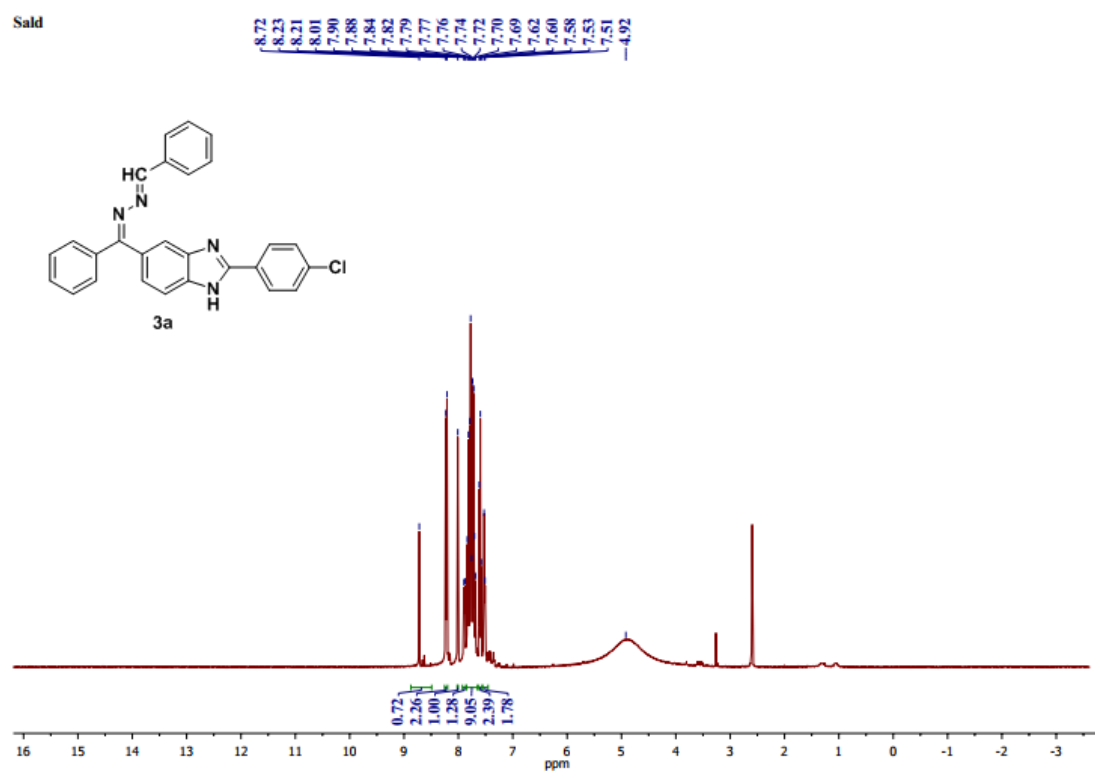

**Figure S1:** <sup>1</sup>H-NMR spectrum of compound 3a

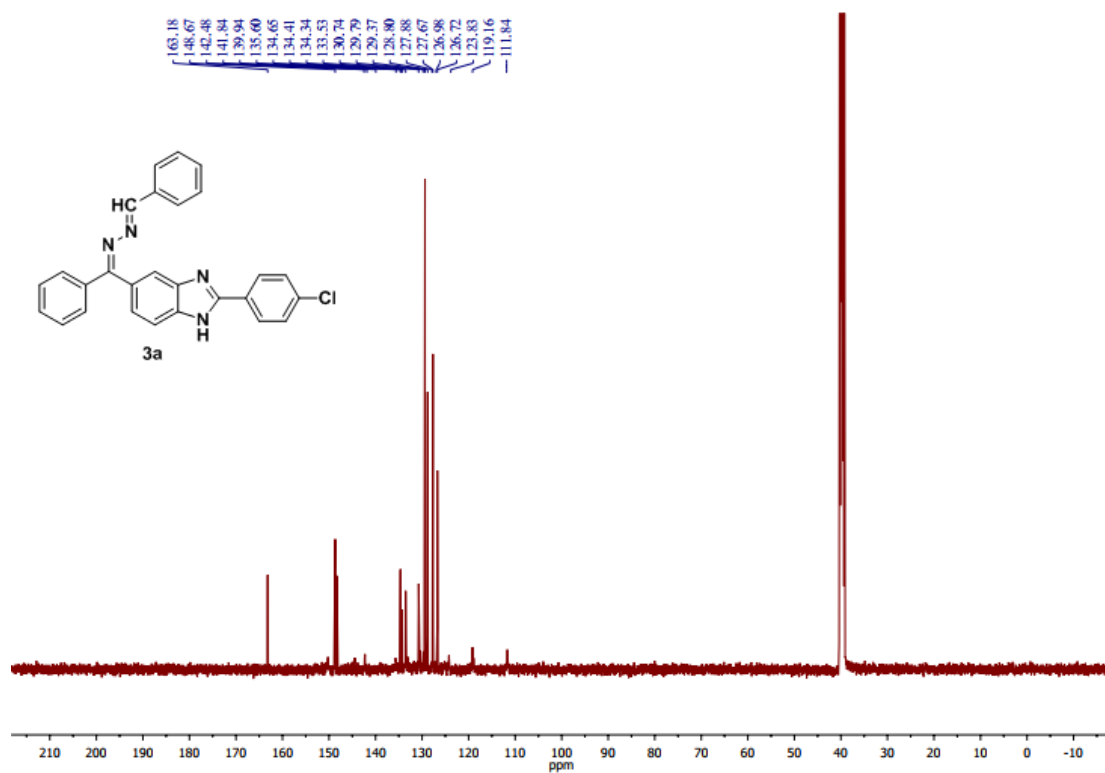

**Figure S2:**  $^{13}\text{C}$ -NMR spectrum of compound **3a**

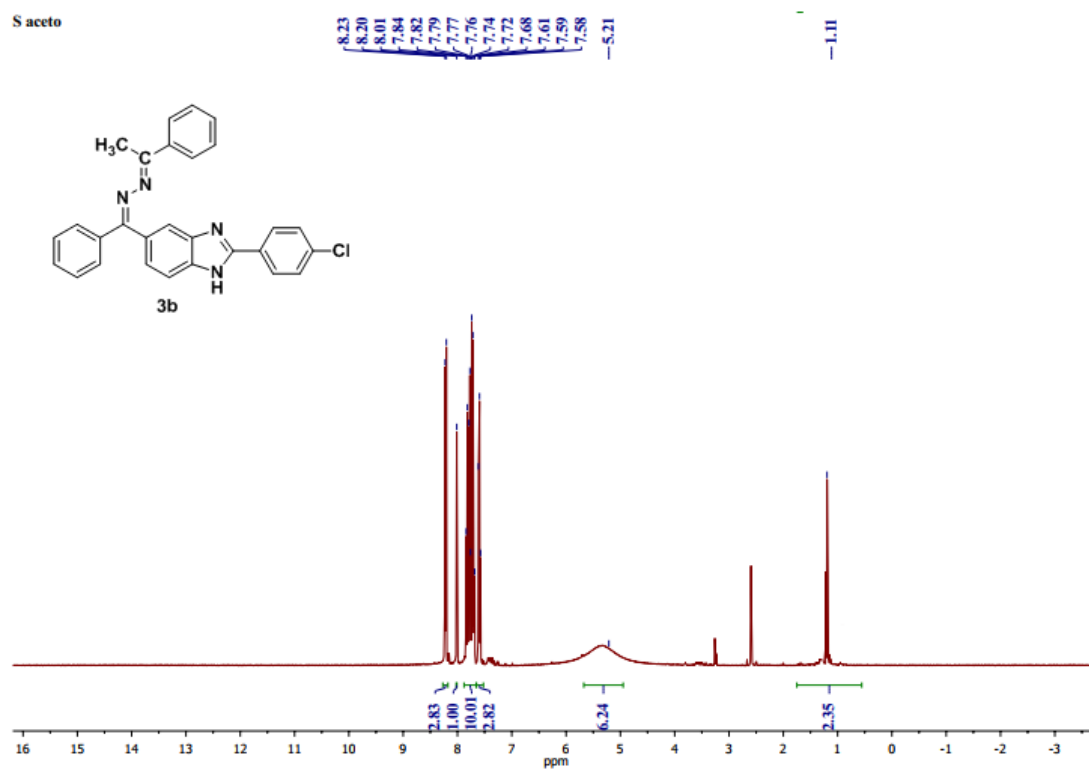

**Figure S3:** <sup>1</sup>H-NMR spectrum of compound **3b**

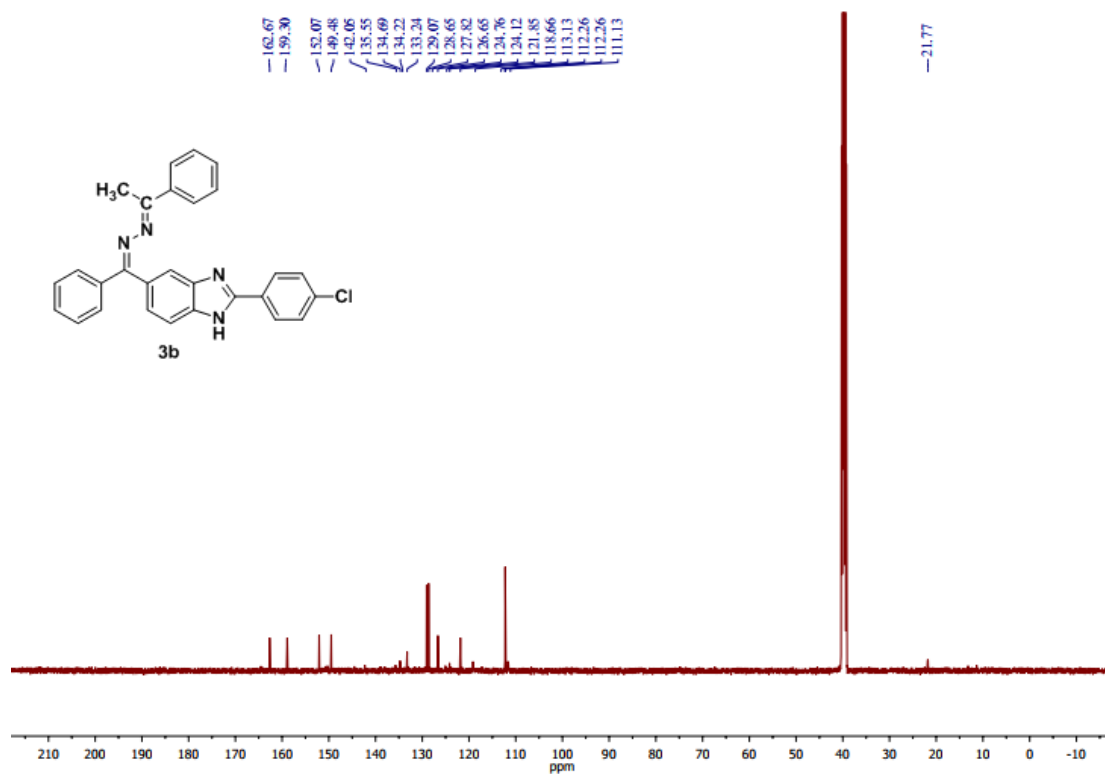

**Figure S4:** <sup>13</sup>C-NMR spectrum of compound **3b**

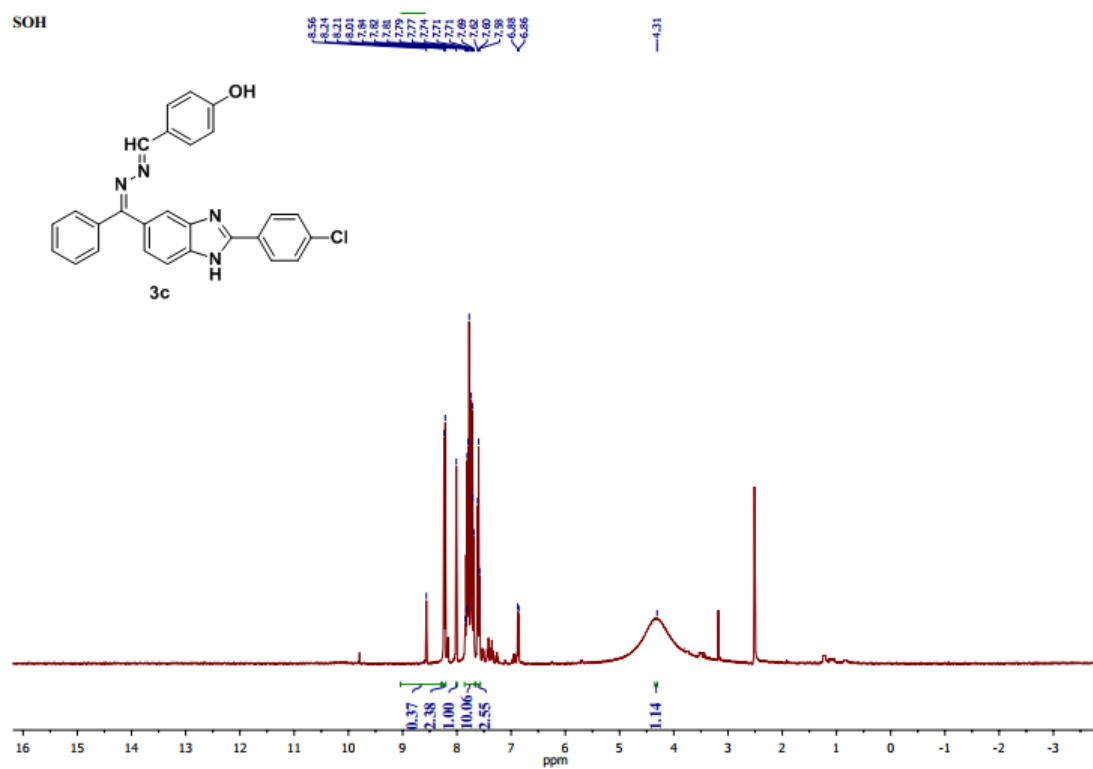

**Figure S5:**  $^1\text{H}$ -NMR spectrum of compound **3c**

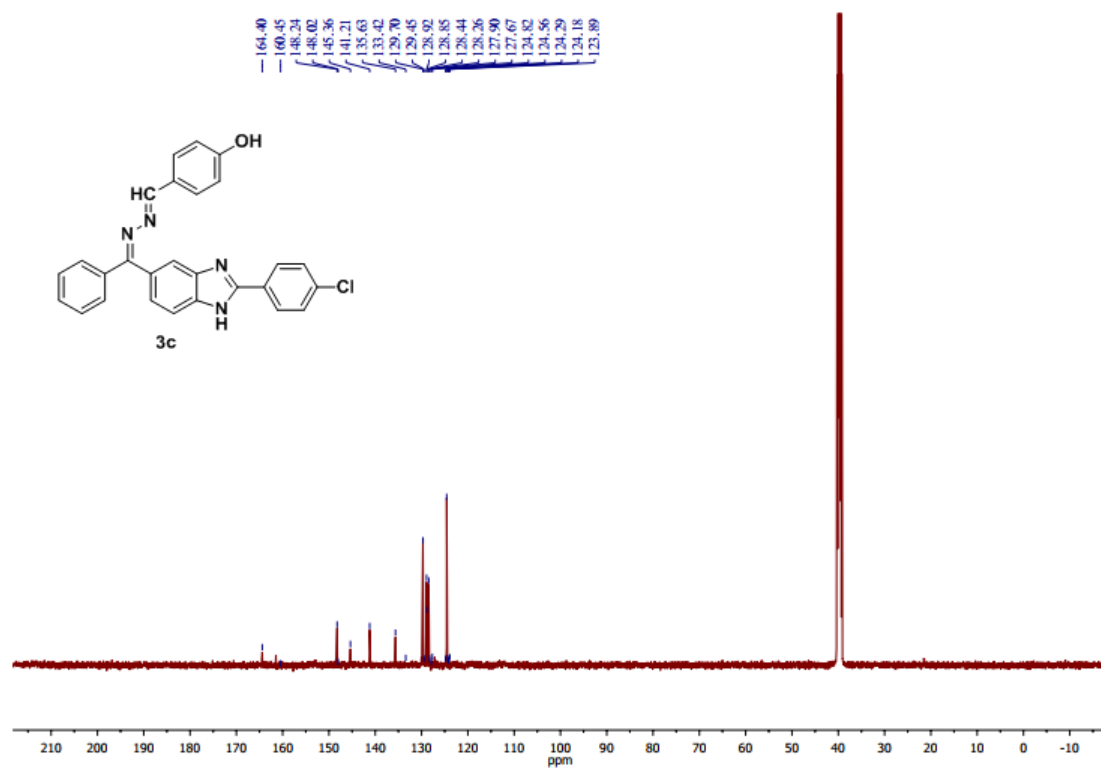

**Figure S6:**  $^{13}\text{C}$ -NMR spectrum of compound **3c**

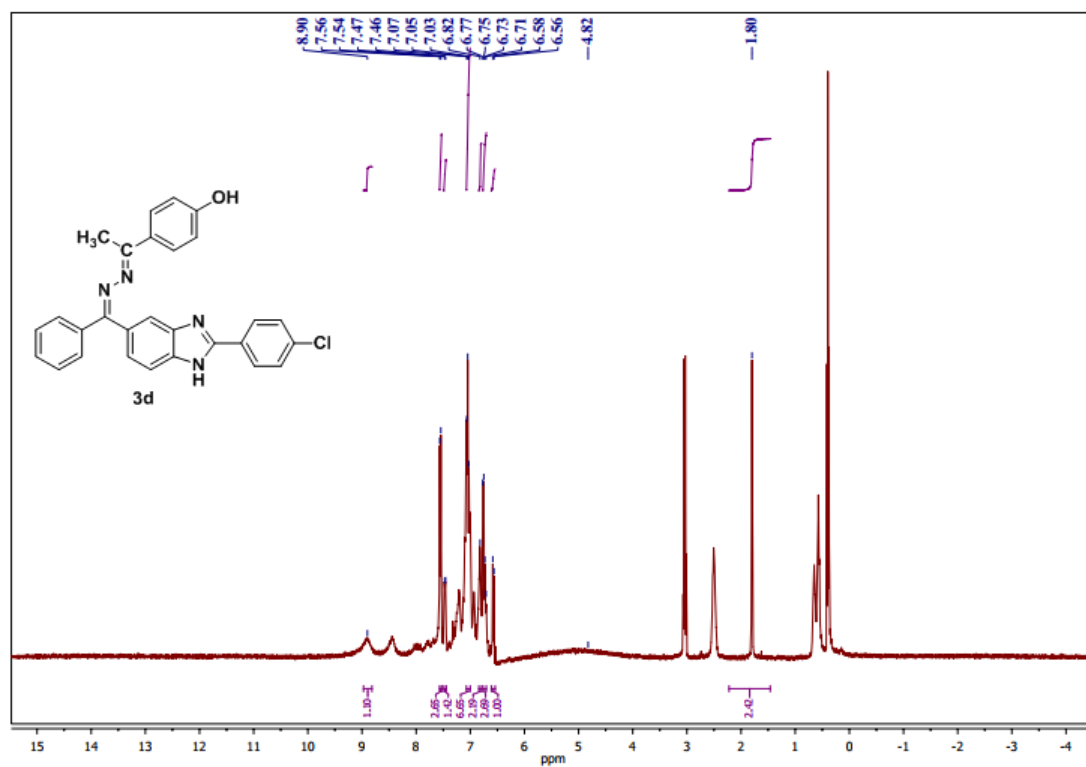

**Figure S7:** <sup>1</sup>H-NMR spectrum of compound **3d**

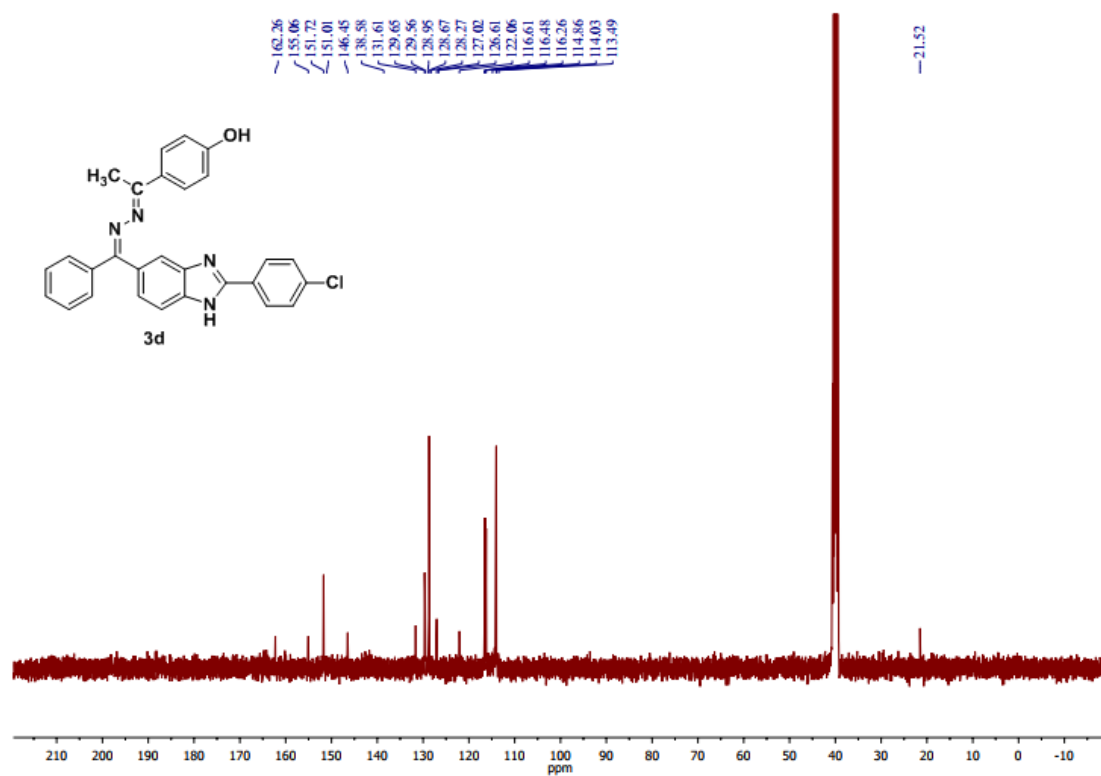

**Figure S8:**  $^{13}\text{C}$ -NMR spectrum of compound **3d**

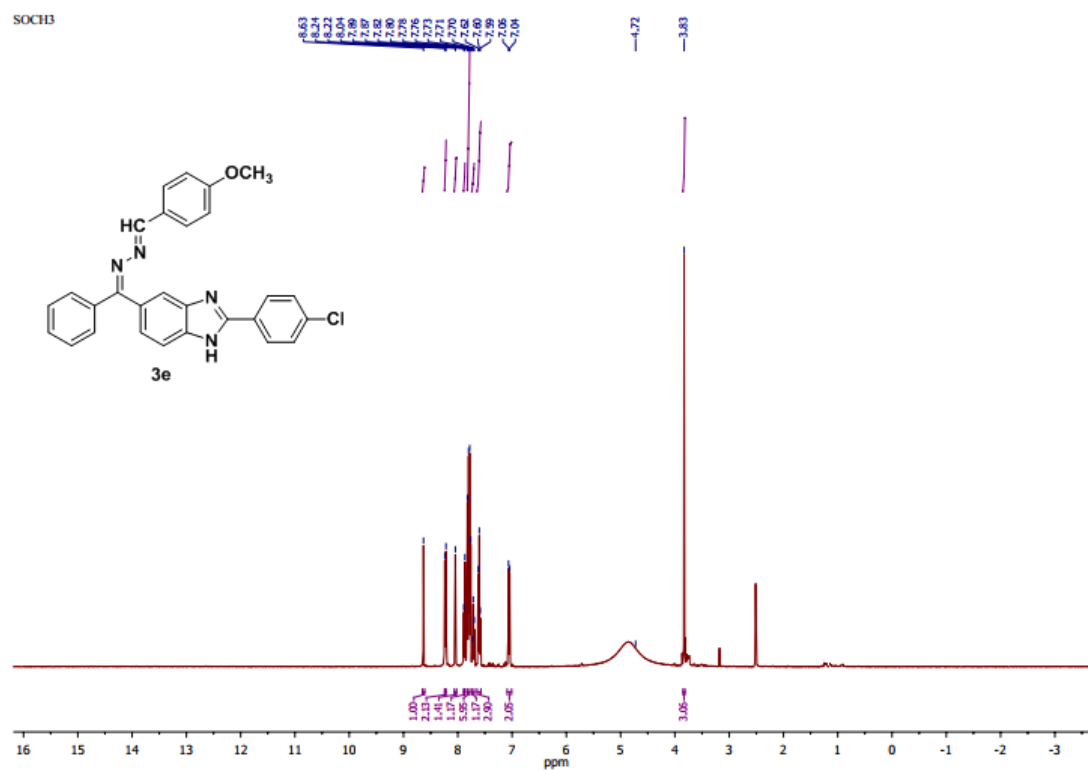

**Figure S9:**  $^1\text{H}$ -NMR spectrum of compound **3e**

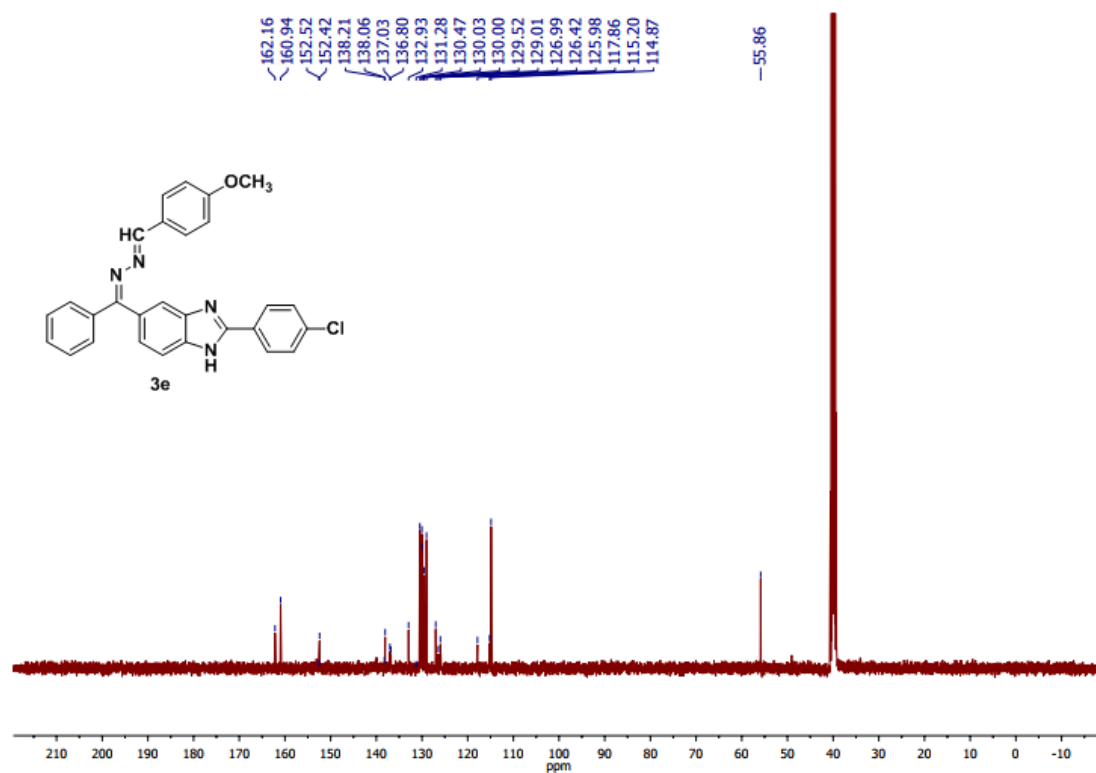

**Figure S10:**  $^{13}\text{C}$ -NMR spectrum of compound **3e**

SAOCH3

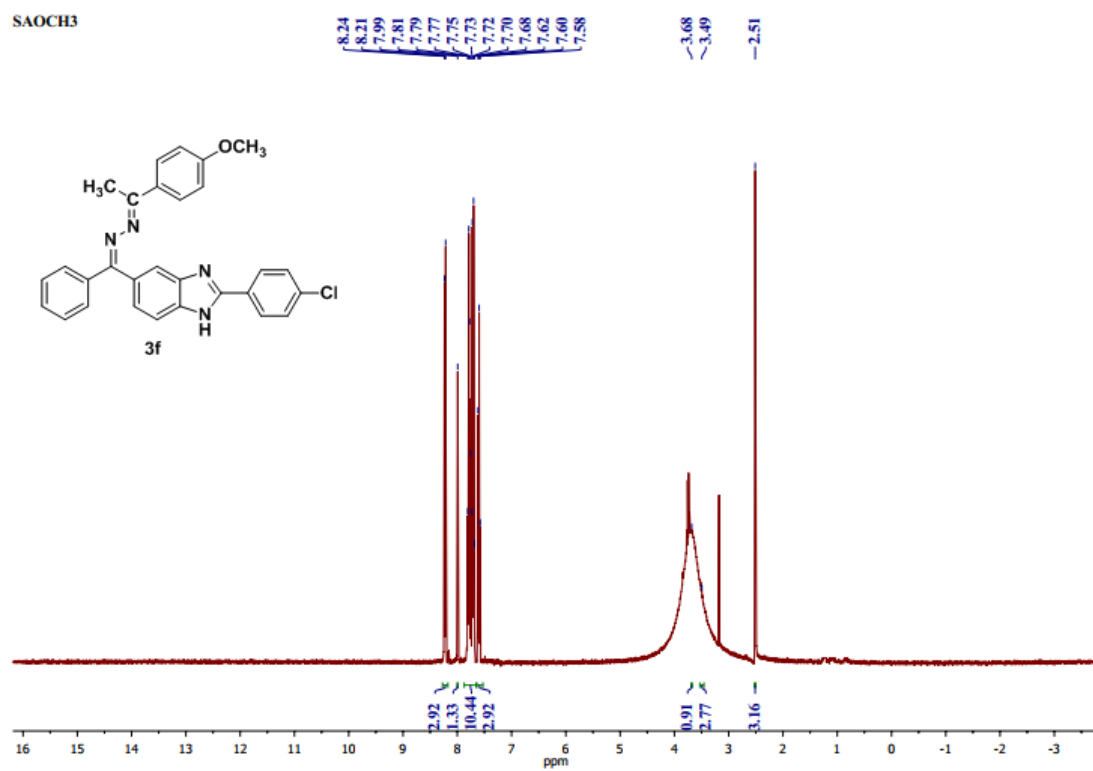

**Figure S11:** <sup>1</sup>H-NMR spectrum of compound **3f**

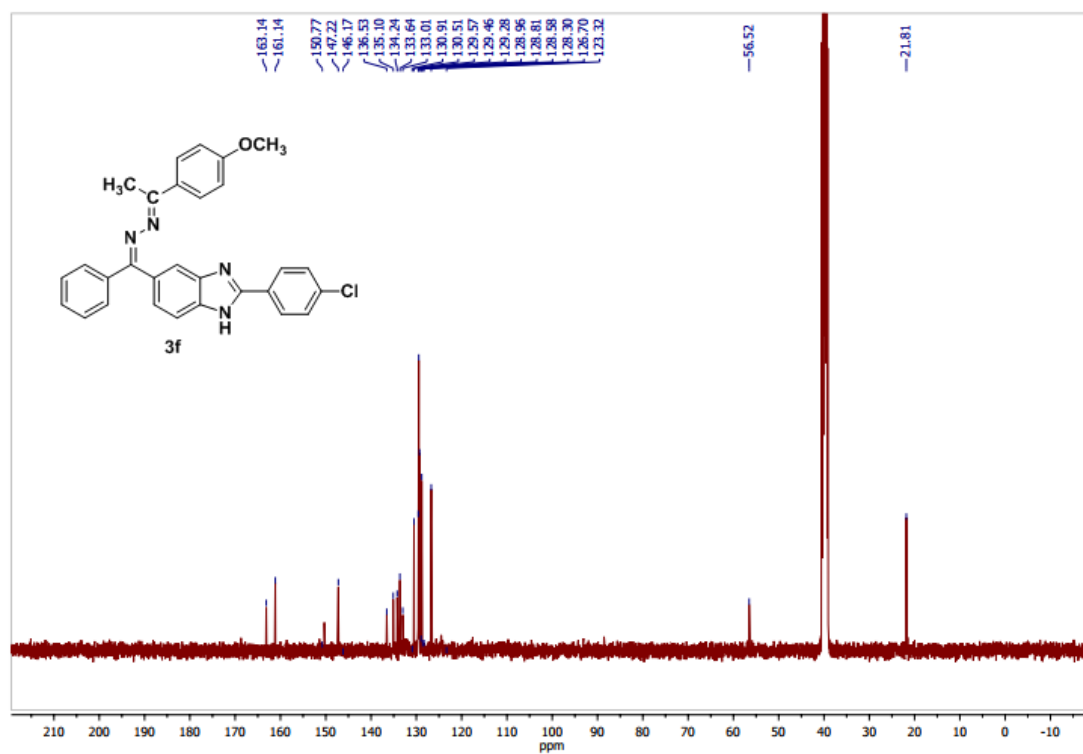

**Figure S12:** <sup>13</sup>C-NMR spectrum of compound 3f

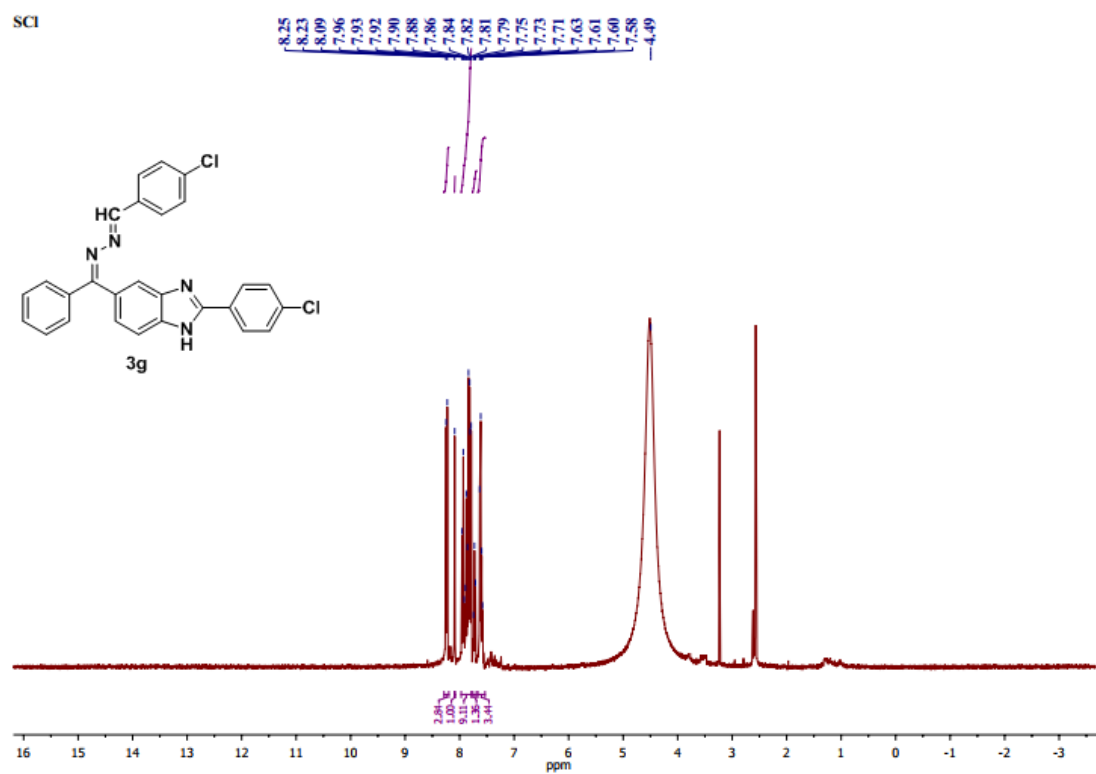

**Figure S13:** <sup>1</sup>H-NMR spectrum of compound 3g

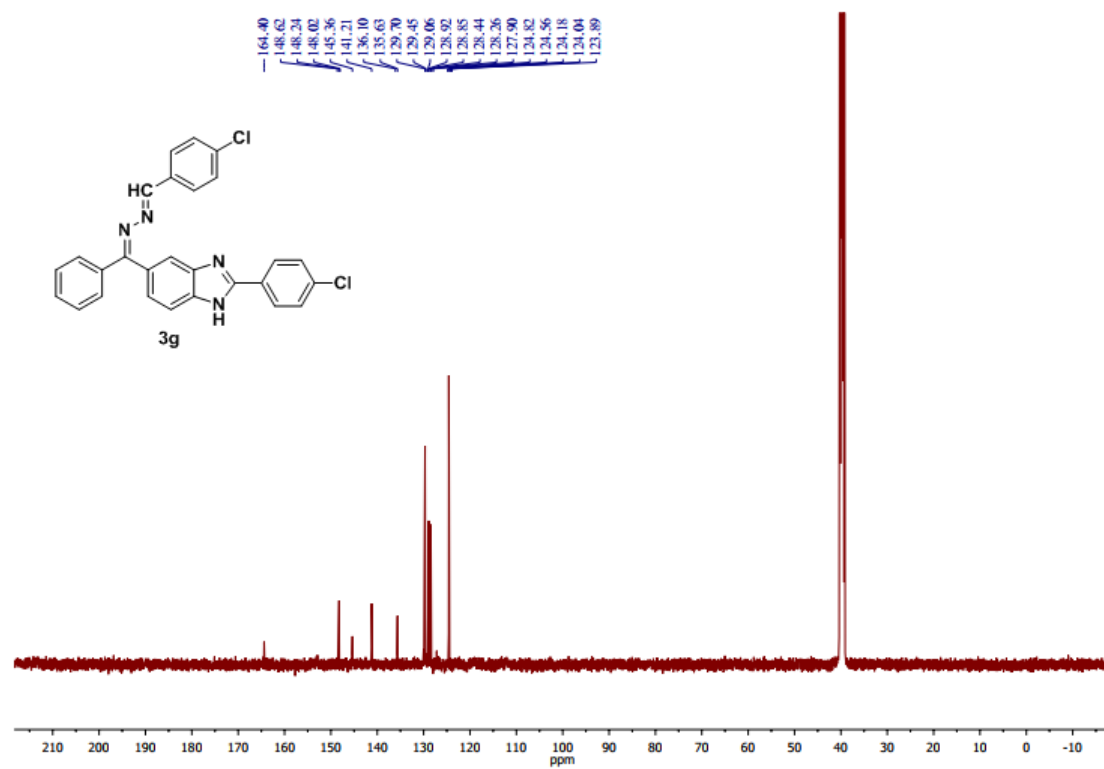

**Figure S14:**  $^{13}\text{C}$ -NMR spectrum of compound **3g**

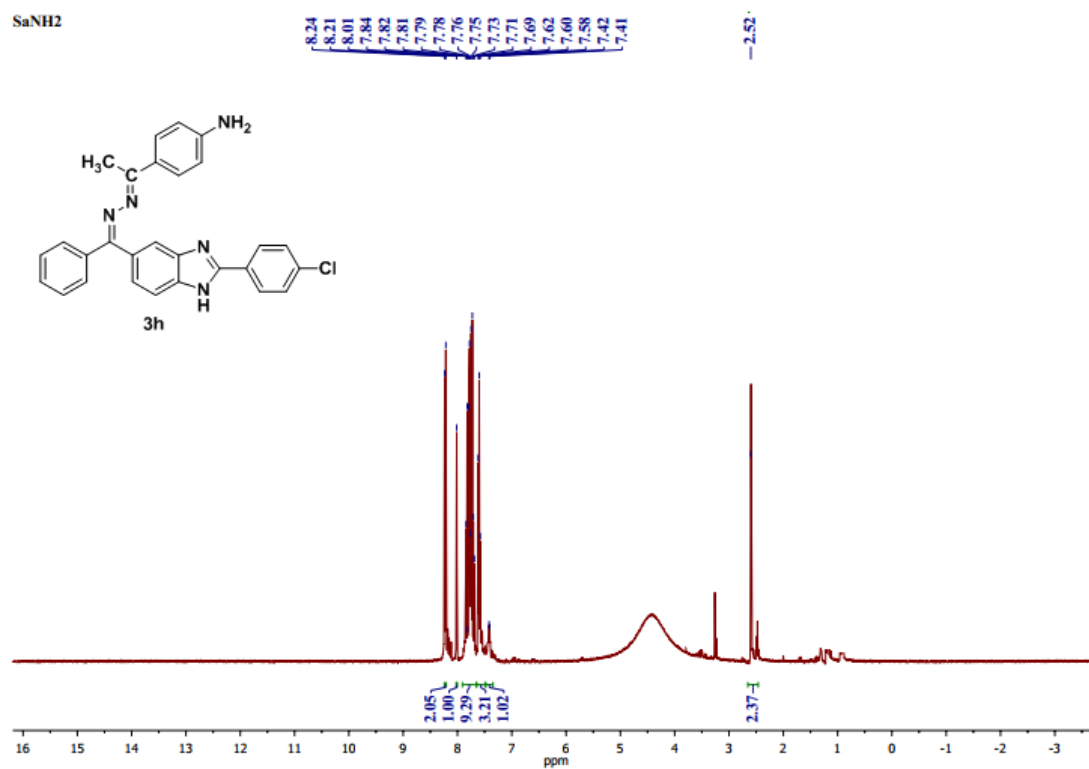

**Figure S15:** <sup>1</sup>H-NMR spectrum of compound **3h**

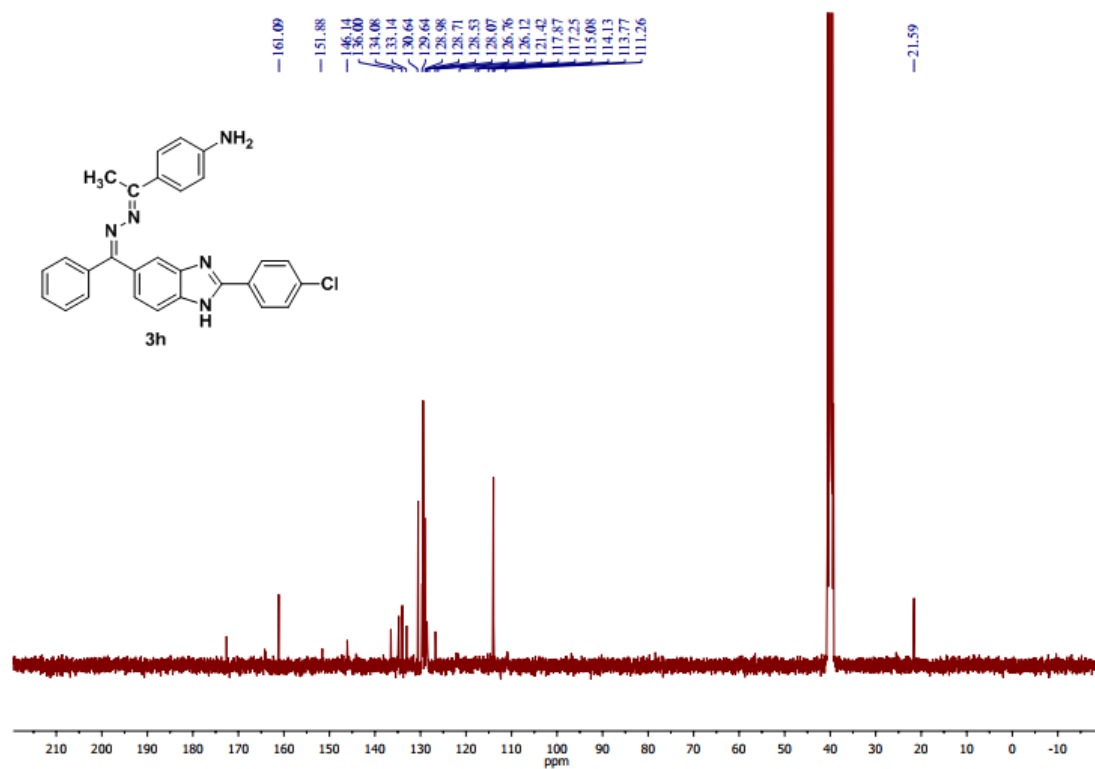

**Figure S16:** <sup>13</sup>C-NMR spectrum of compound **3h**

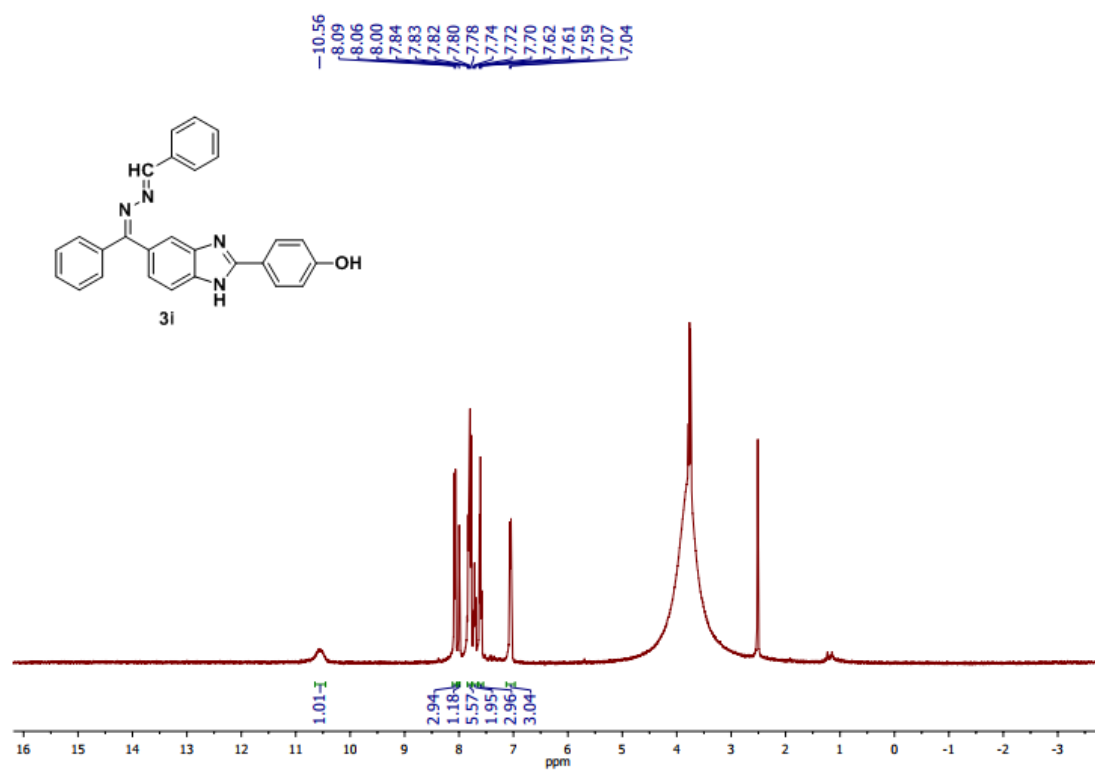

**Figure S17:** <sup>1</sup>H-NMR spectrum of compound **3i**

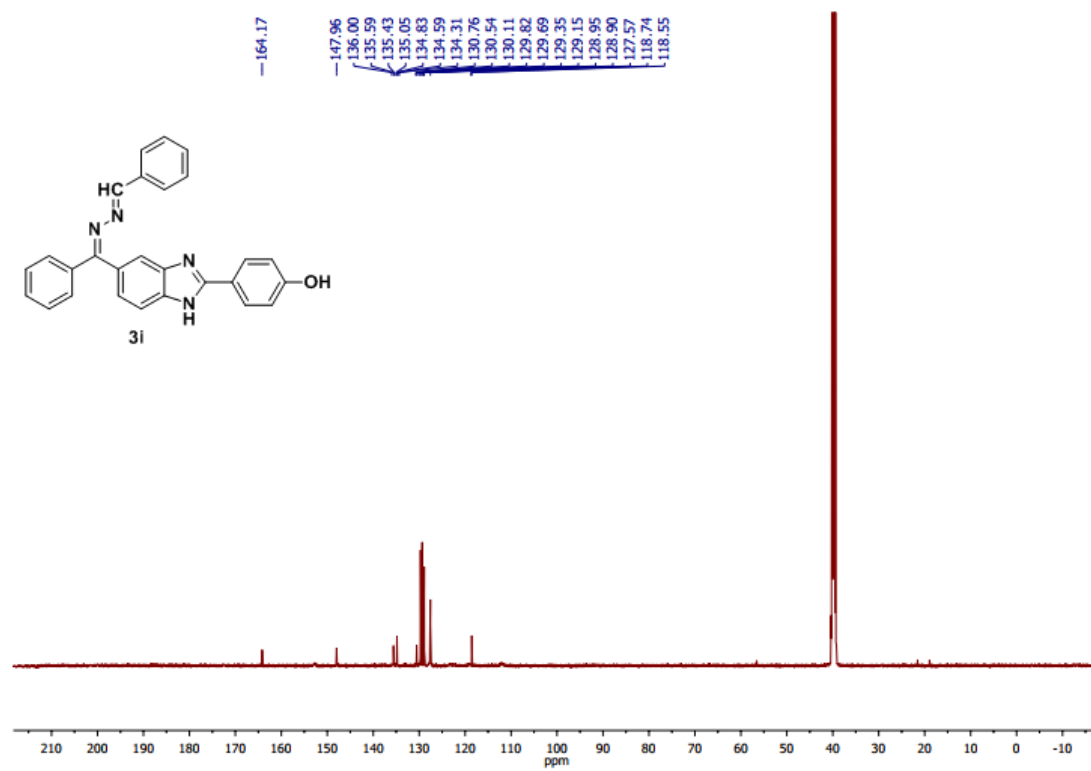

**Figure S18:**  $^{13}\text{C}$ -NMR spectrum of compound **3i**

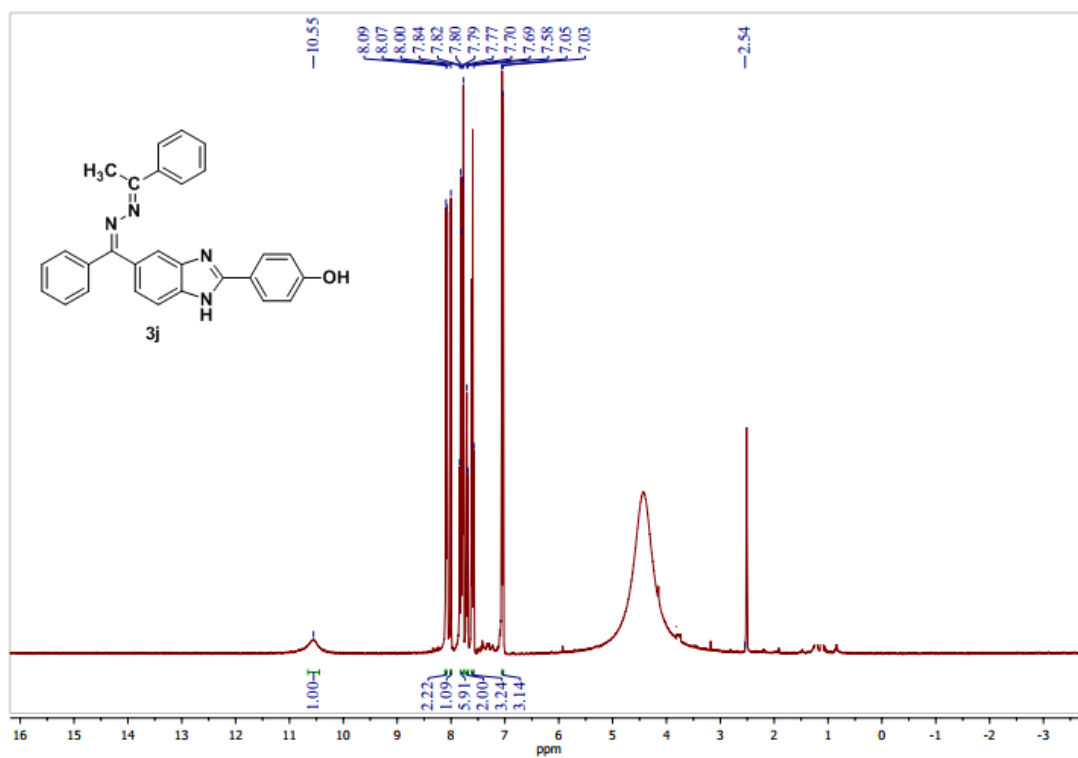

**Figure S19:** <sup>1</sup>H-NMR spectrum of compound **3j**

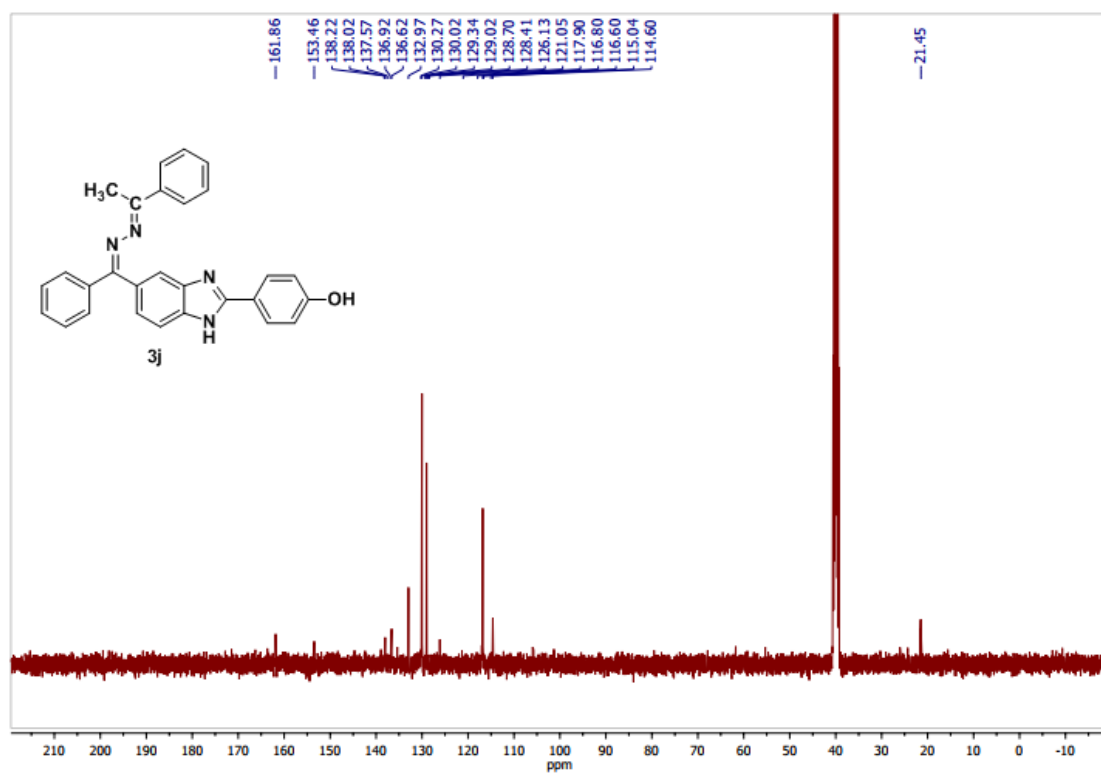

**Figure S20:**  $^{13}\text{C}$ -NMR spectrum of compound **3j**

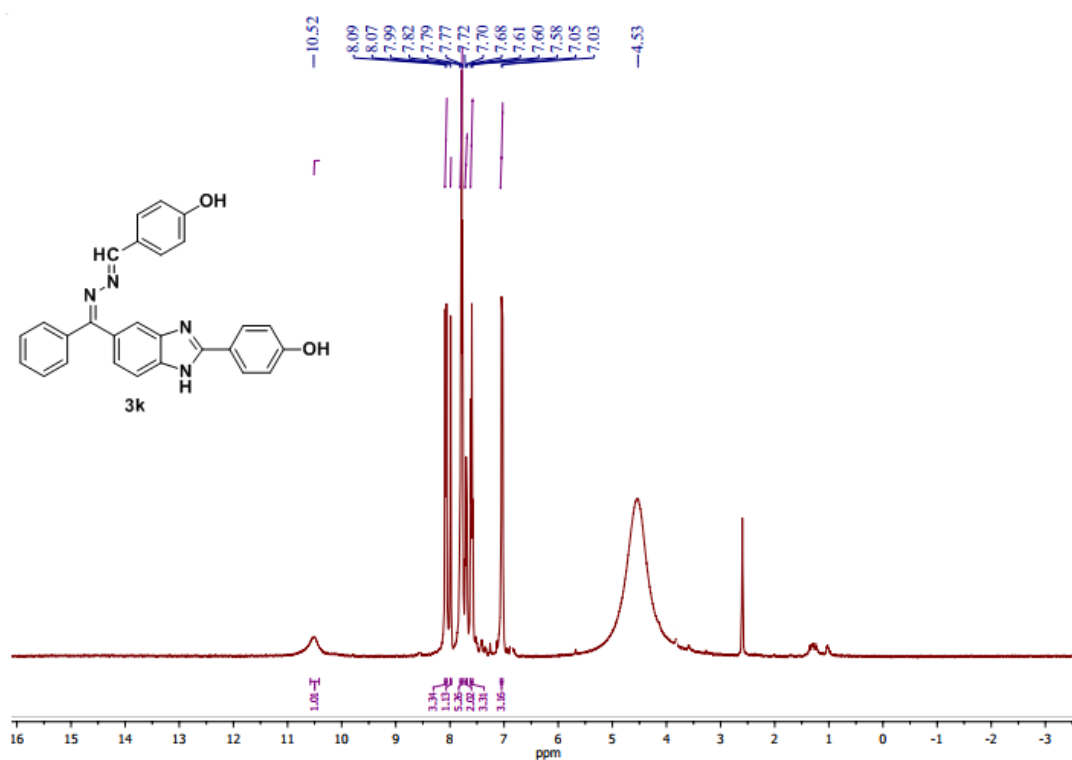

**Figure S21:**  $^1\text{H}$ -NMR spectrum of compound **3k**

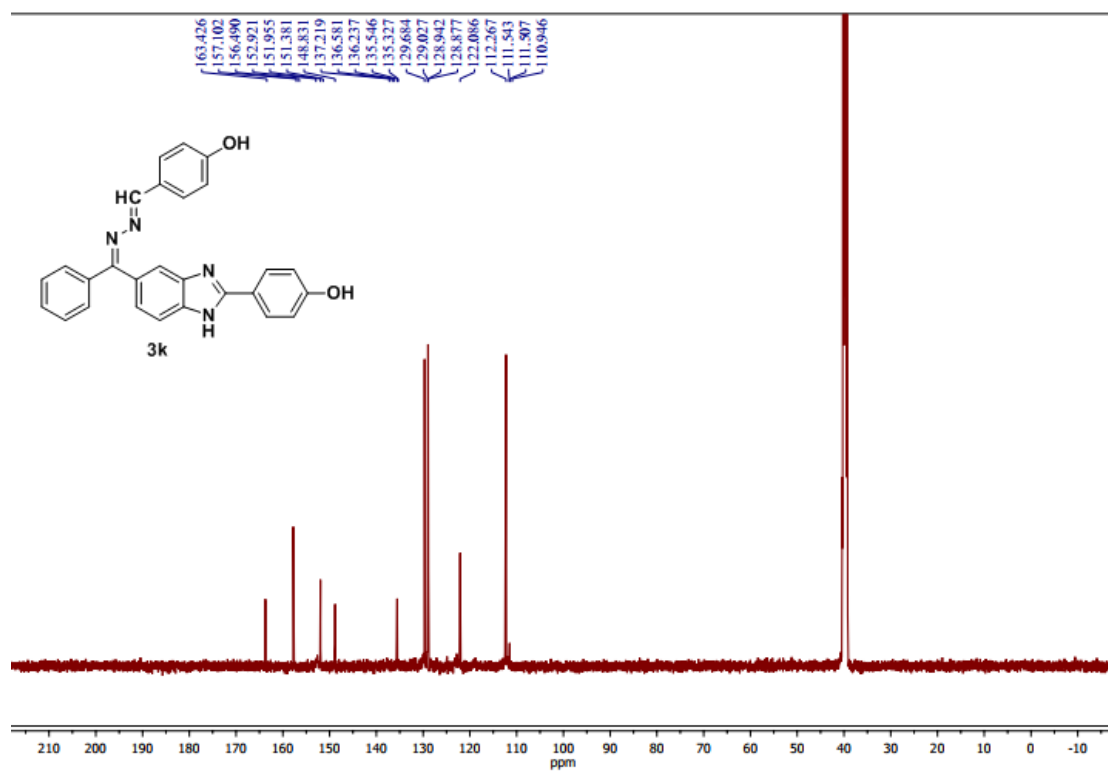

**Figure S22:** <sup>13</sup>C-NMR spectrum of compound **3k**

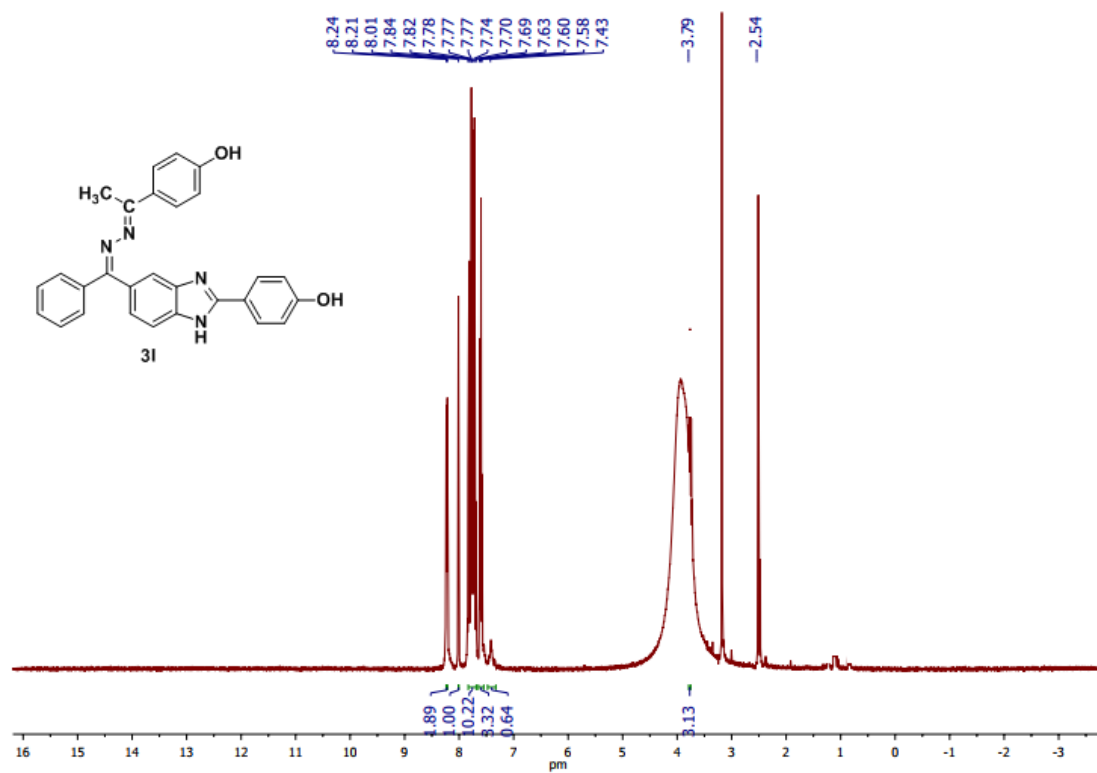

**Figure S23:** <sup>1</sup>H-NMR spectrum of compound 31

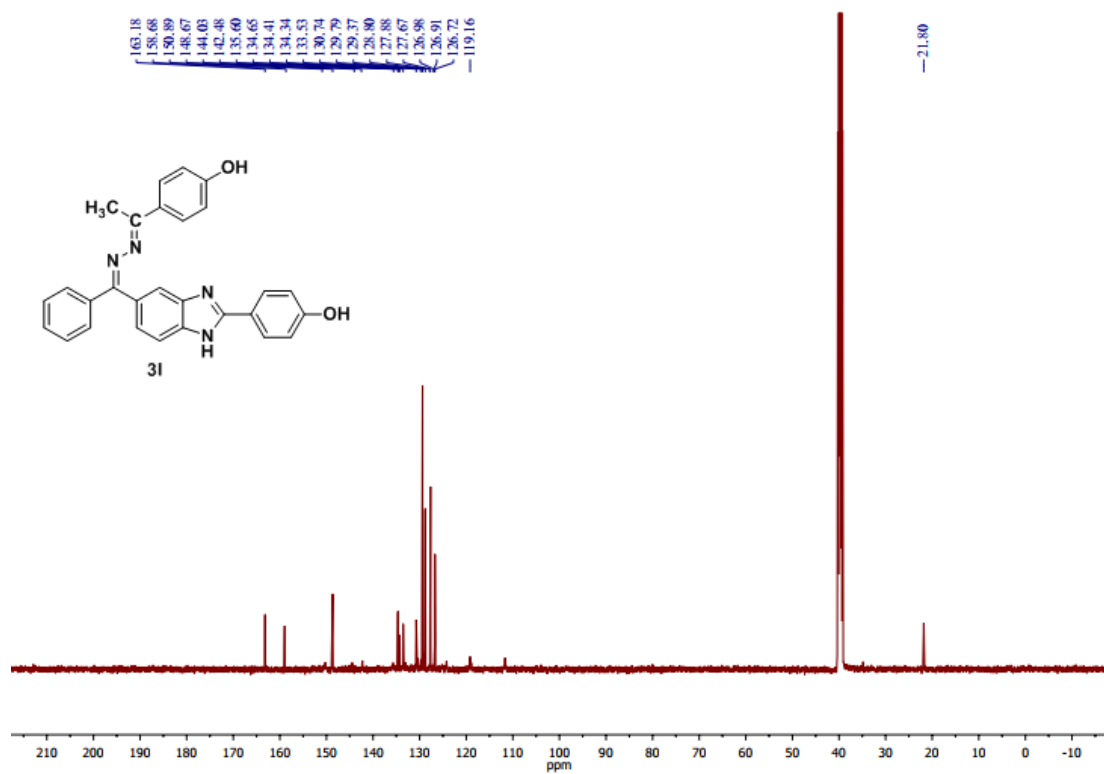

**Figure S24:** <sup>13</sup>C-NMR spectrum of compound 3I

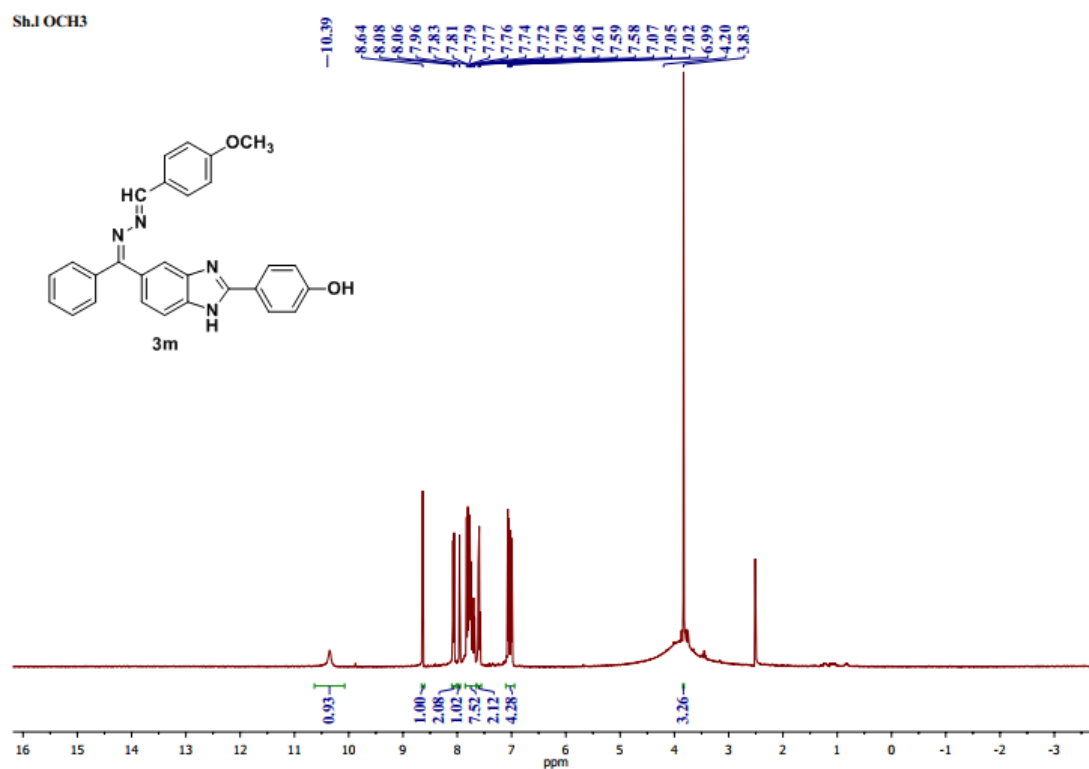

**Figure S25:** <sup>1</sup>H-NMR spectrum of compound **3m**

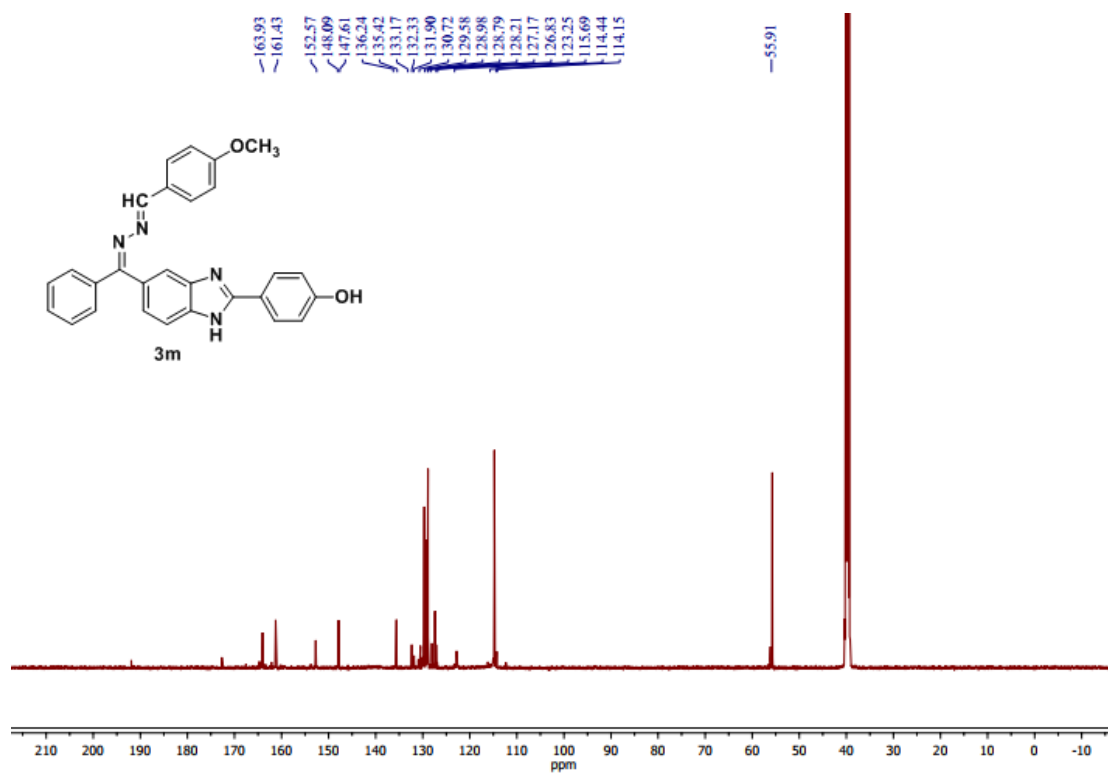

**Figure S26:**  $^{13}\text{C}$ -NMR spectrum of compound **3m**

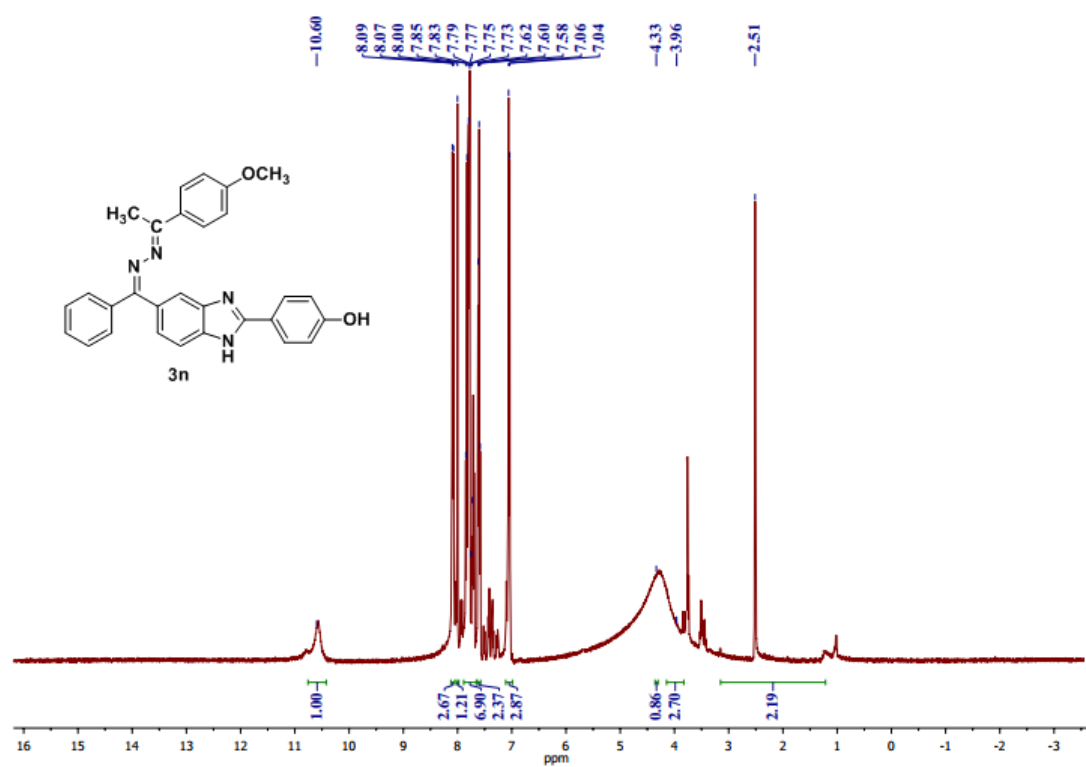

**Figure S27:** <sup>1</sup>H-NMR spectrum of compound **3n**

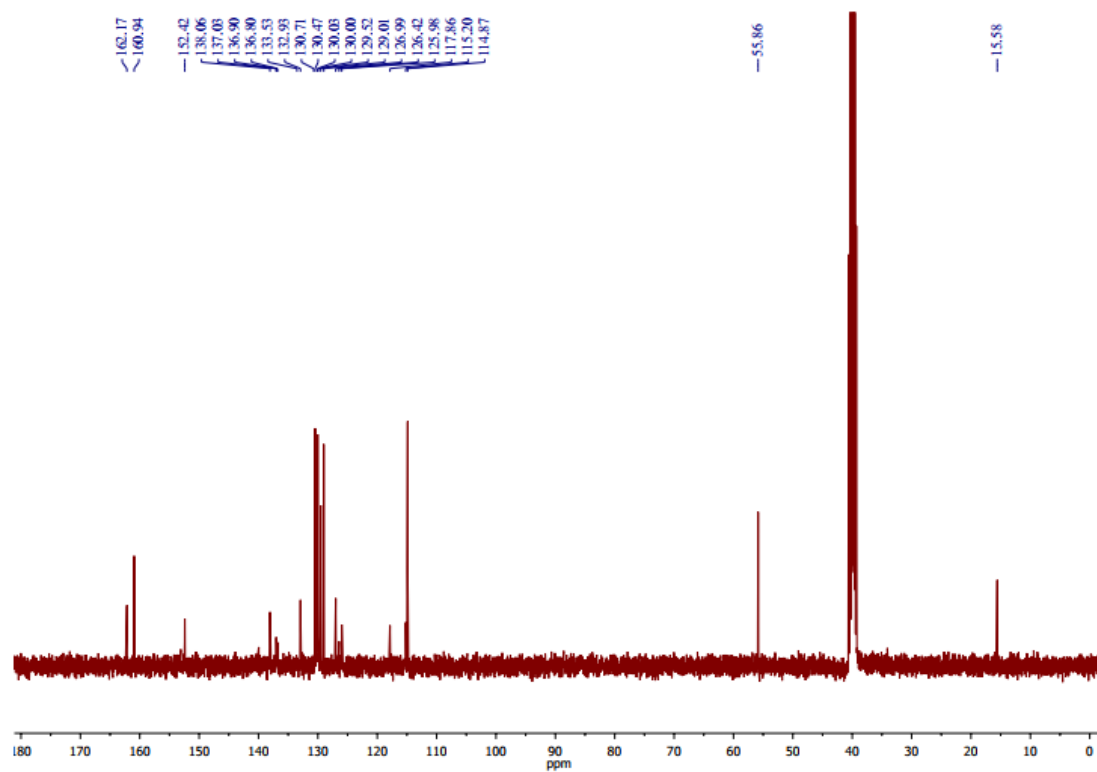

**Figure S28:** <sup>13</sup>C-NMR spectrum of compound **3n**

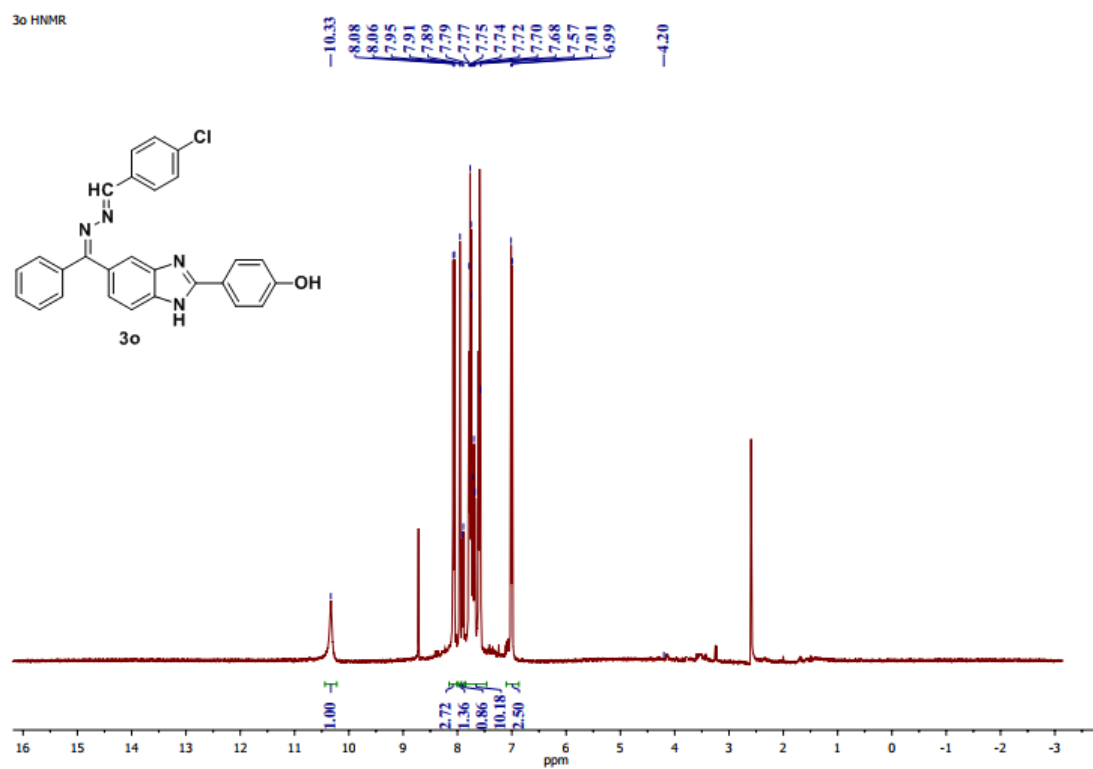

**Figure S29:**  $^1\text{H}$ -NMR spectrum of compound **3o**

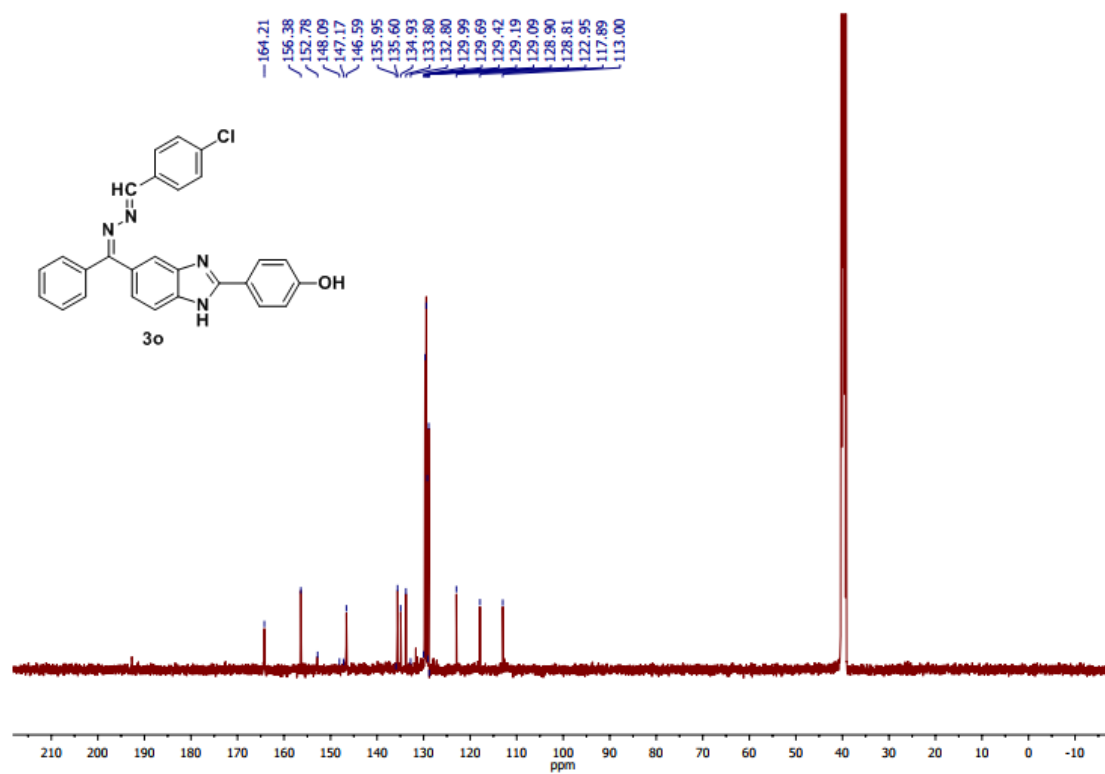

**Figure S30:**  $^{13}\text{C}$ -NMR spectrum of compound **3o**

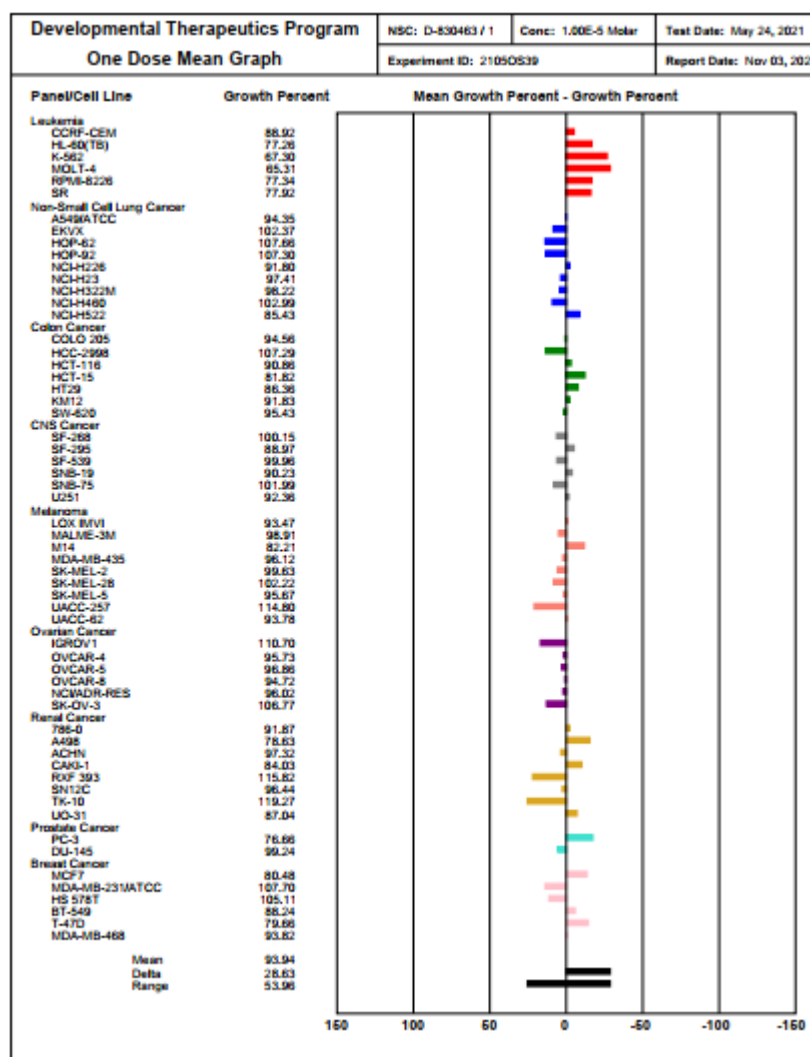

**Figure S31:** Results of primary *in vitro* one-dose anticancer assay of compound **3a**.

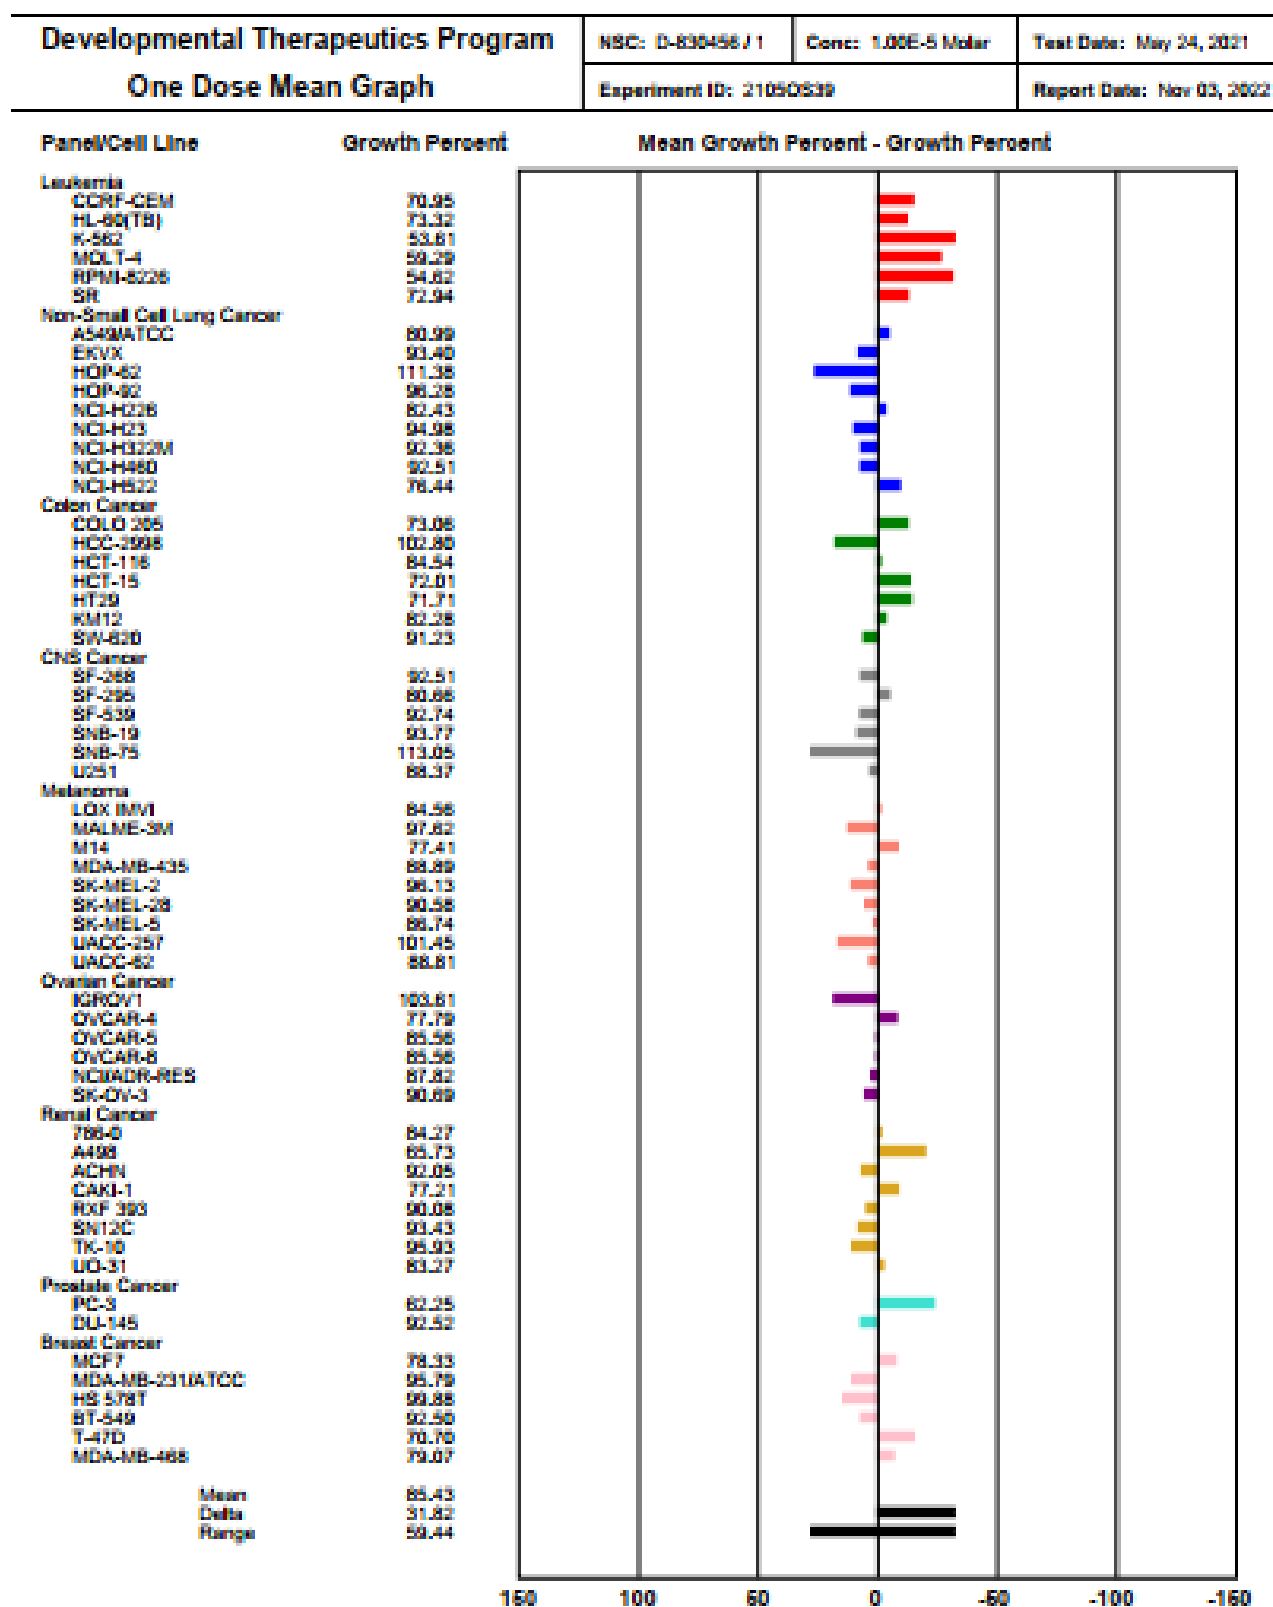

**Figure S32:** Results of primary *in vitro* one-dose anticancer assay of compound **3b**.

Developmental Therapeutics Program  
One Dose Mean Graph

|                         |                           |                         |
|-------------------------|---------------------------|-------------------------|
| HSC: D-838444 / 1       | Conc: 1.00E-5 Molar       | Test Date: May 24, 2021 |
| Experiment ID: 21050839 | Report Date: Feb 12, 2022 |                         |

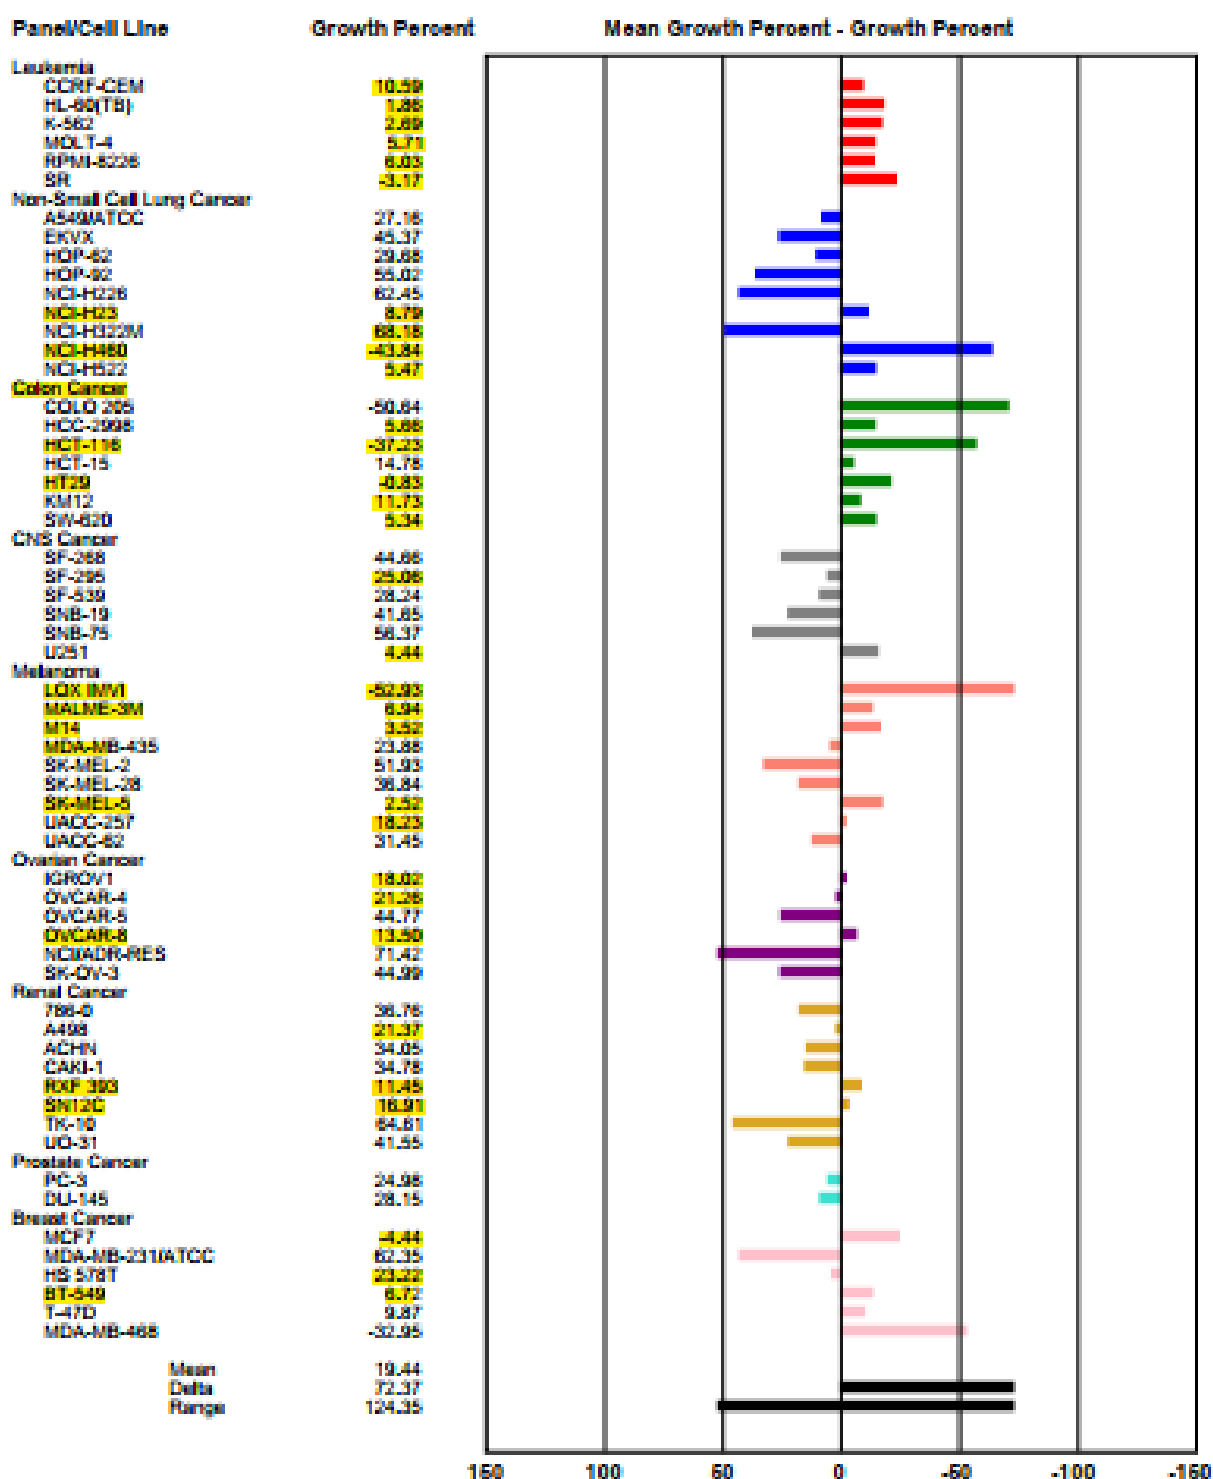

Figure S33: Results of primary *in vitro* one-dose anticancer assay of compound **3c**.

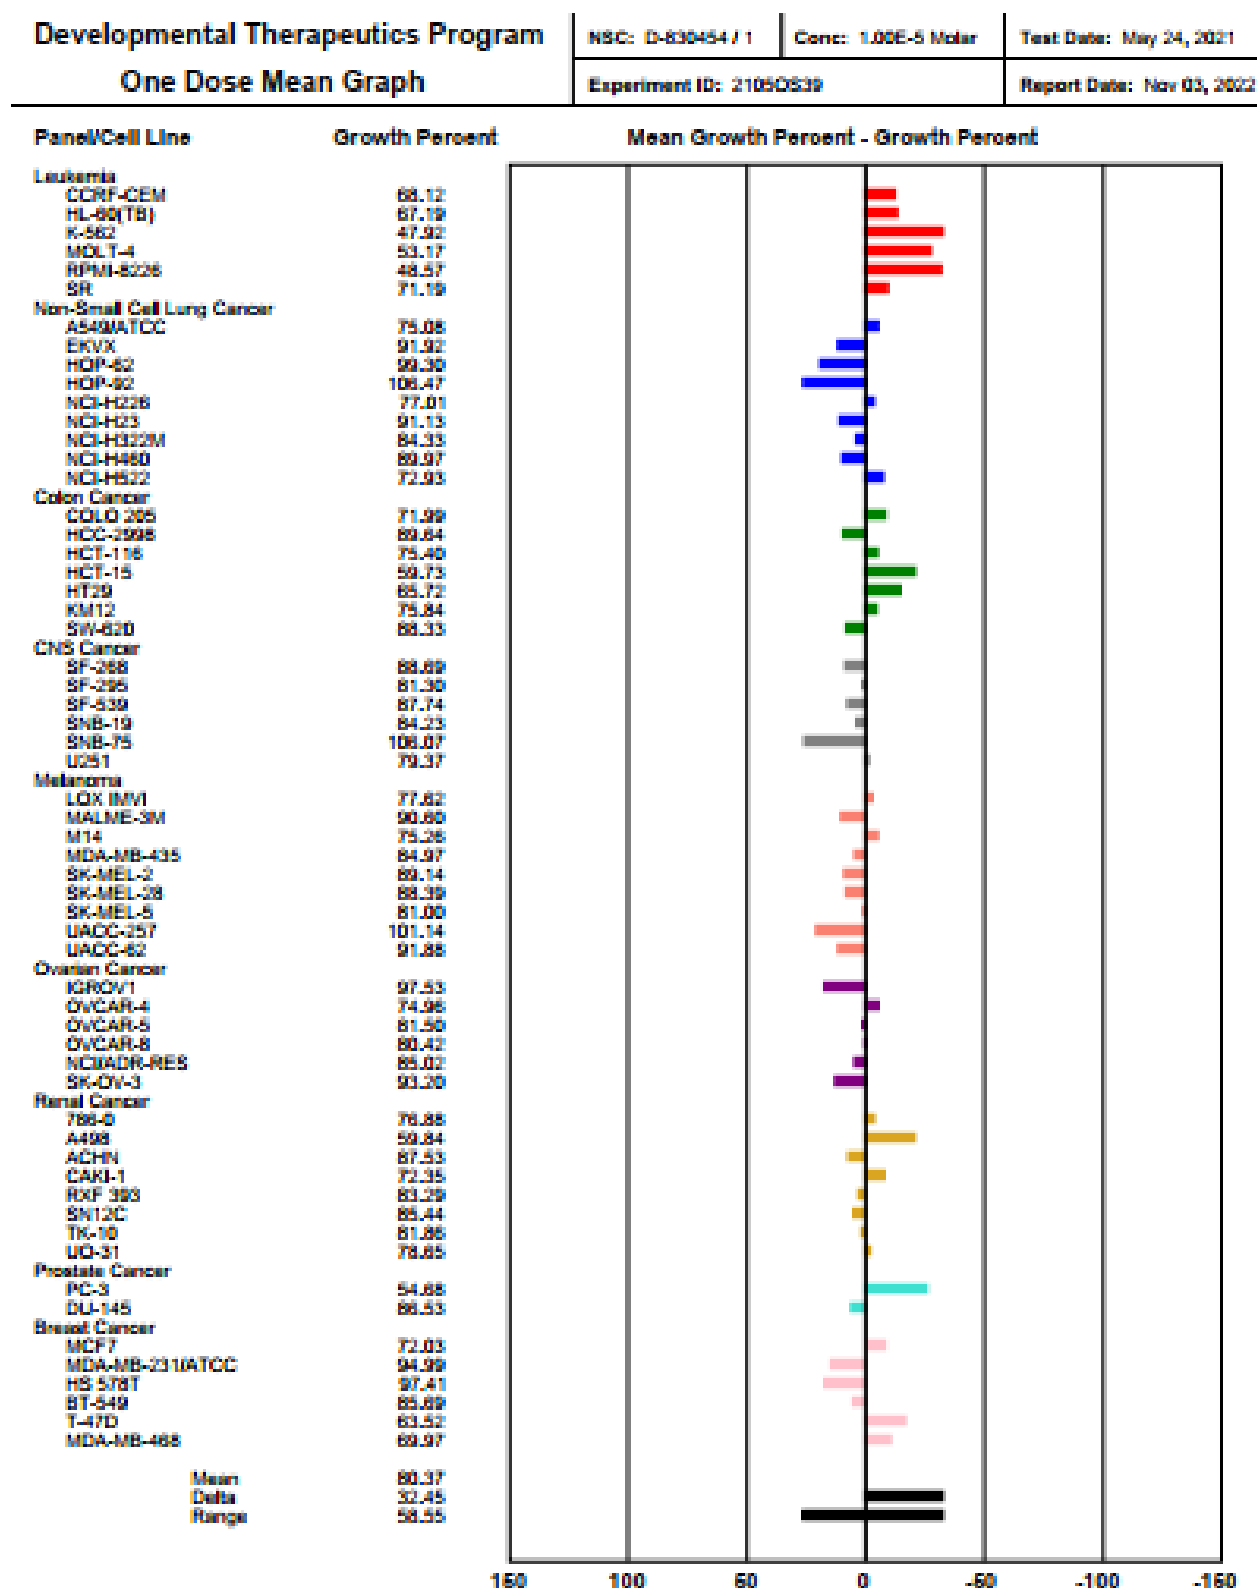

**Figure S34:** Results of primary *in vitro* one-dose anticancer assay of compound **3d**.

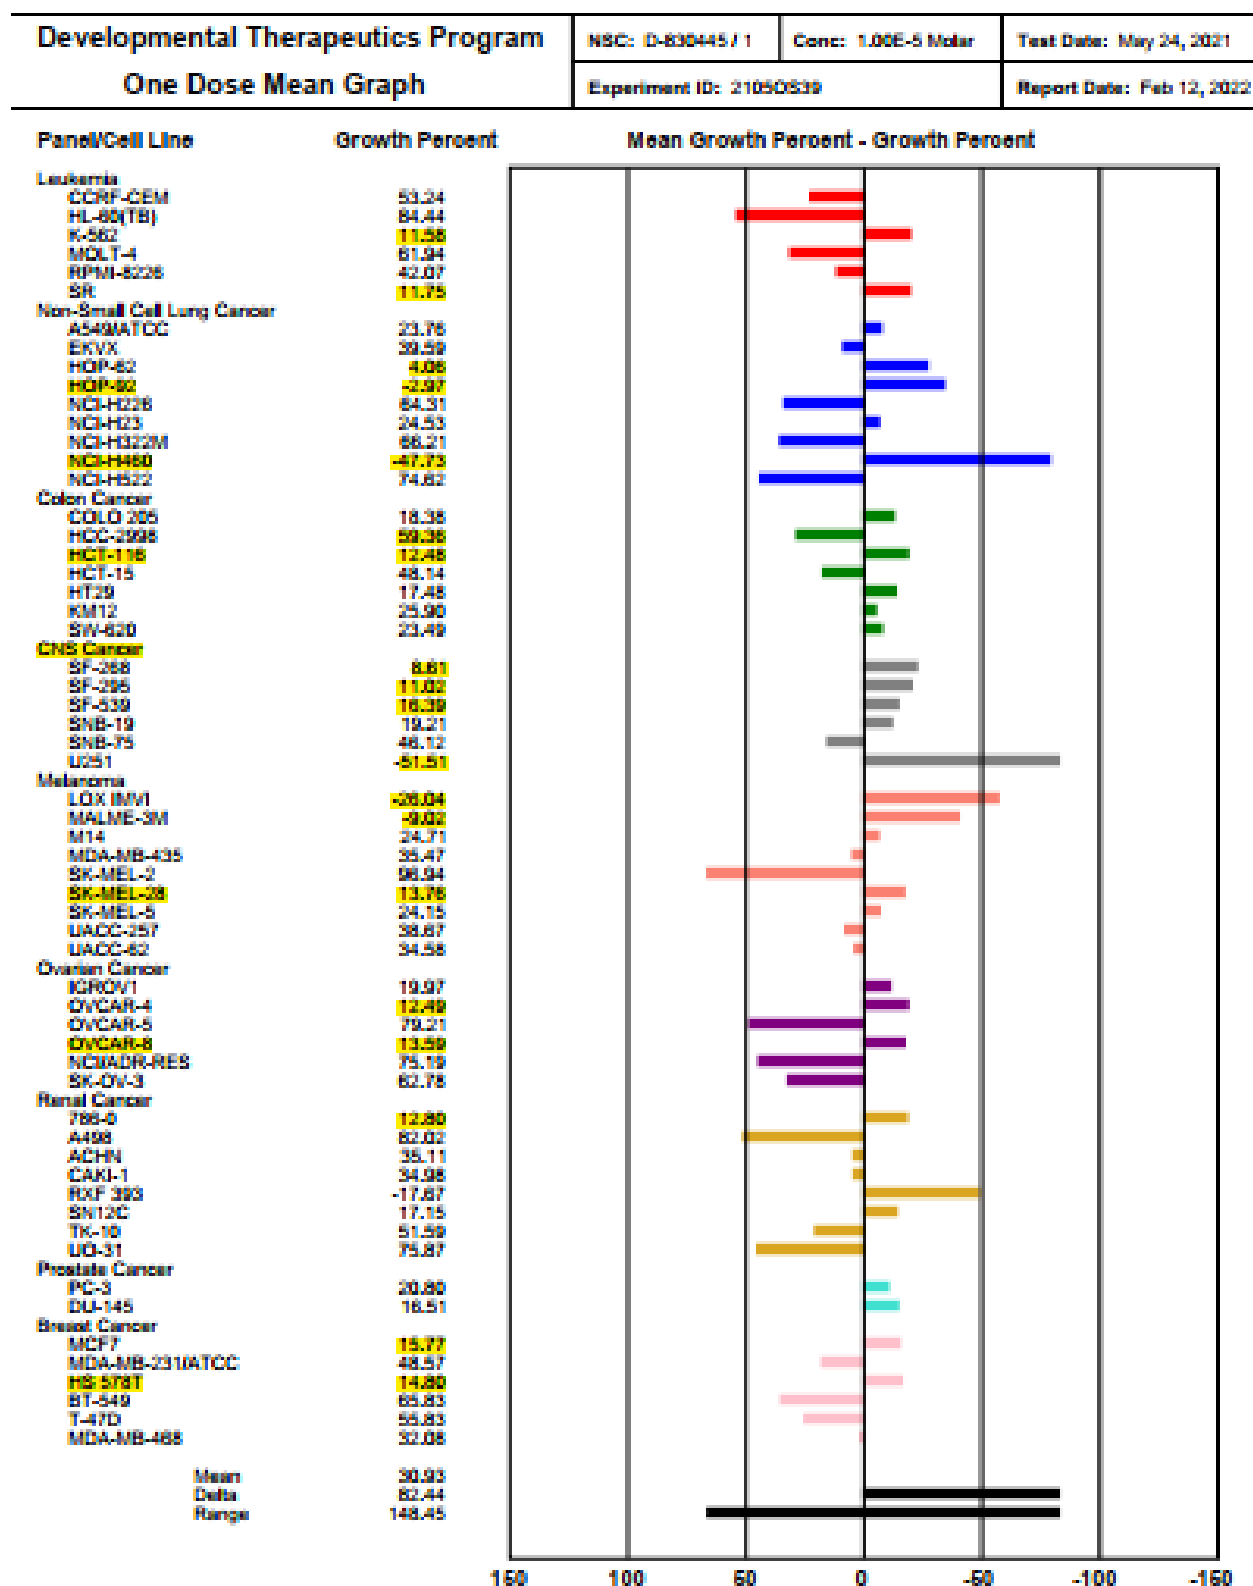

**Figure S35:** Results of primary *in vitro* one-dose anticancer assay of compound 3e.

Developmental Therapeutics Program  
One Dose Mean Graph

HSC: D-830455 / 1      Conc: 1.00E-5 Molar      Test Date: May 24, 2021  
Experiment ID: 21050839      Report Date: Nov 03, 2022

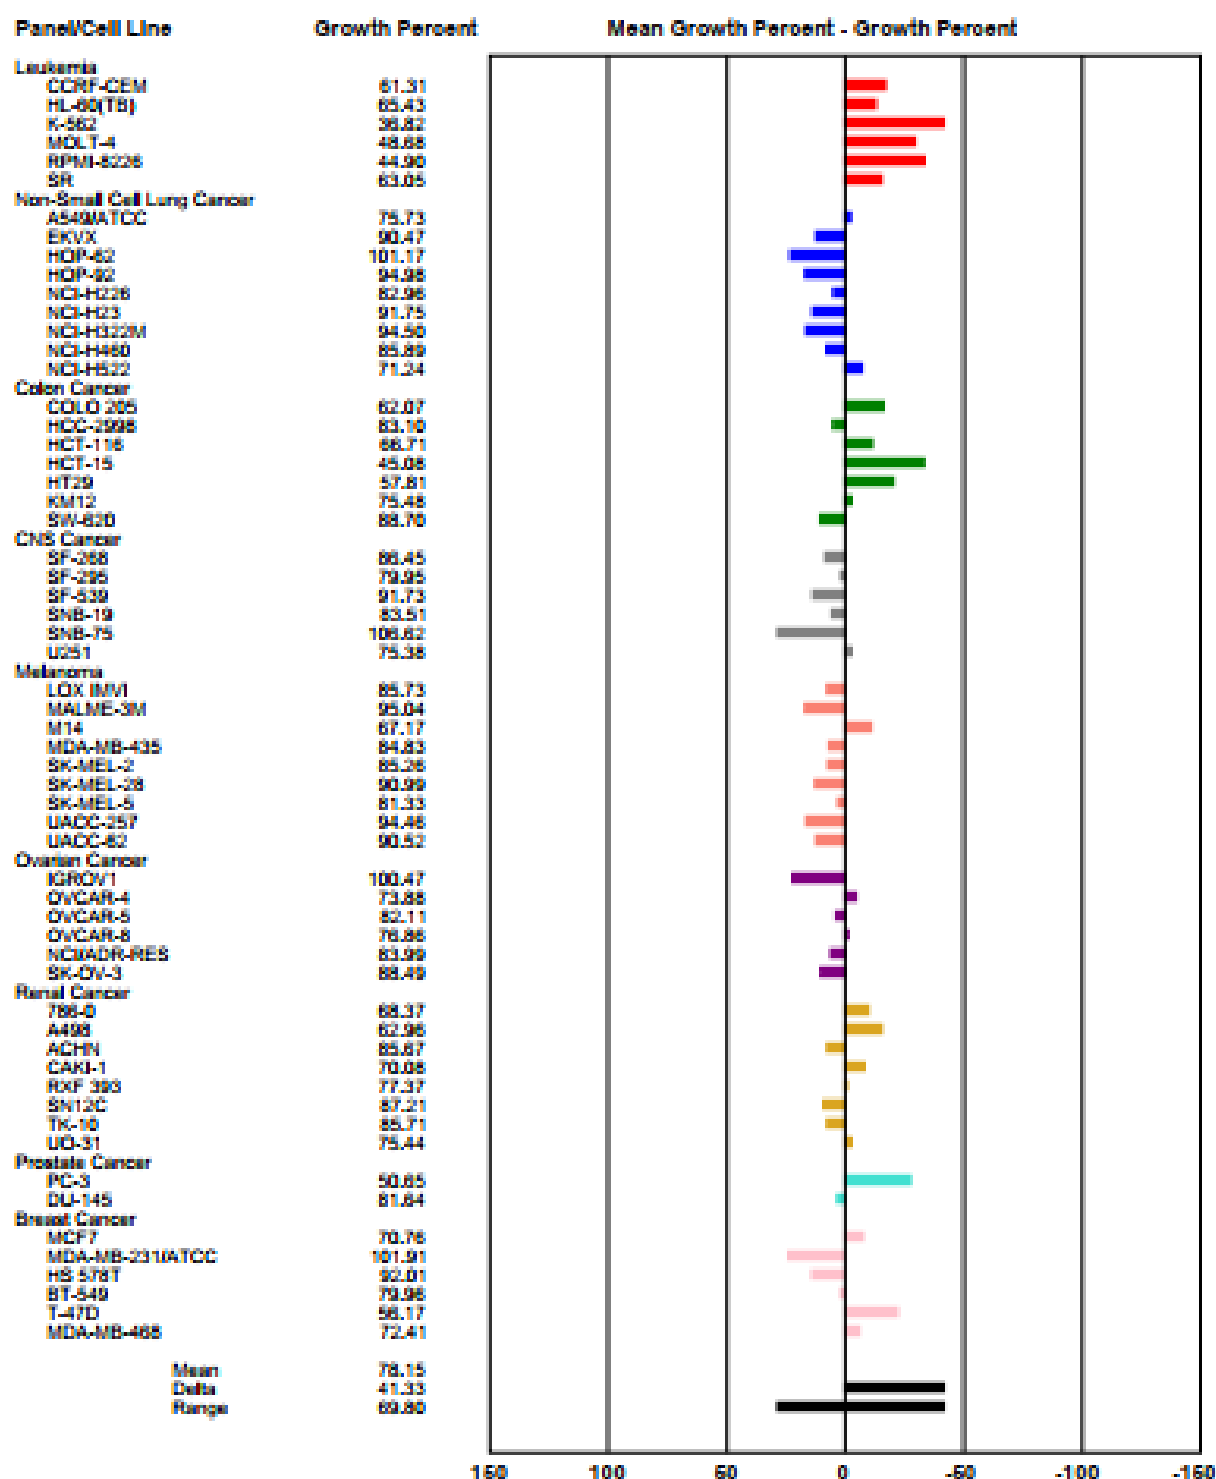

Figure S36: Results of primary *in vitro* one-dose anticancer assay of compound 3f.

Developmental Therapeutics Program  
One Dose Mean Graph

HSC: D-830446 / 1      Conc: 1.00E-5 Molar      Test Date: May 24, 2021  
Experiment ID: 21050639      Report Date: Feb 12, 2022

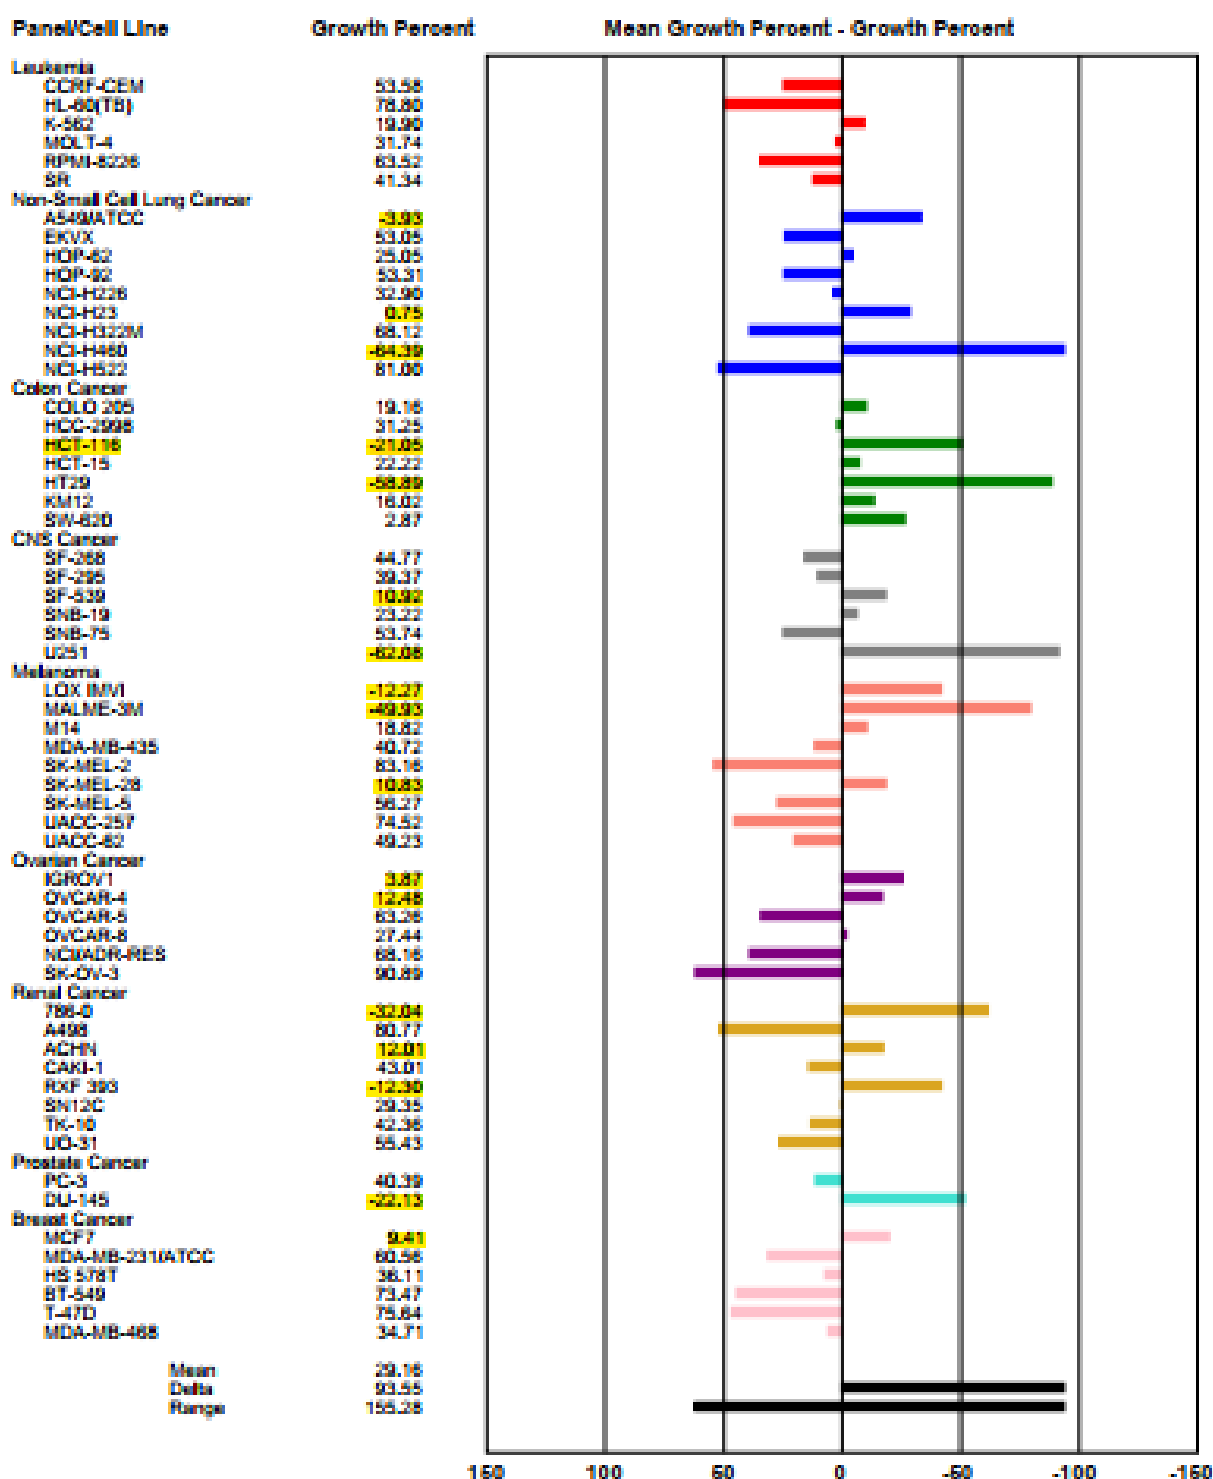

Figure S37: Results of primary *in vitro* one-dose anticancer assay of compound 3g.

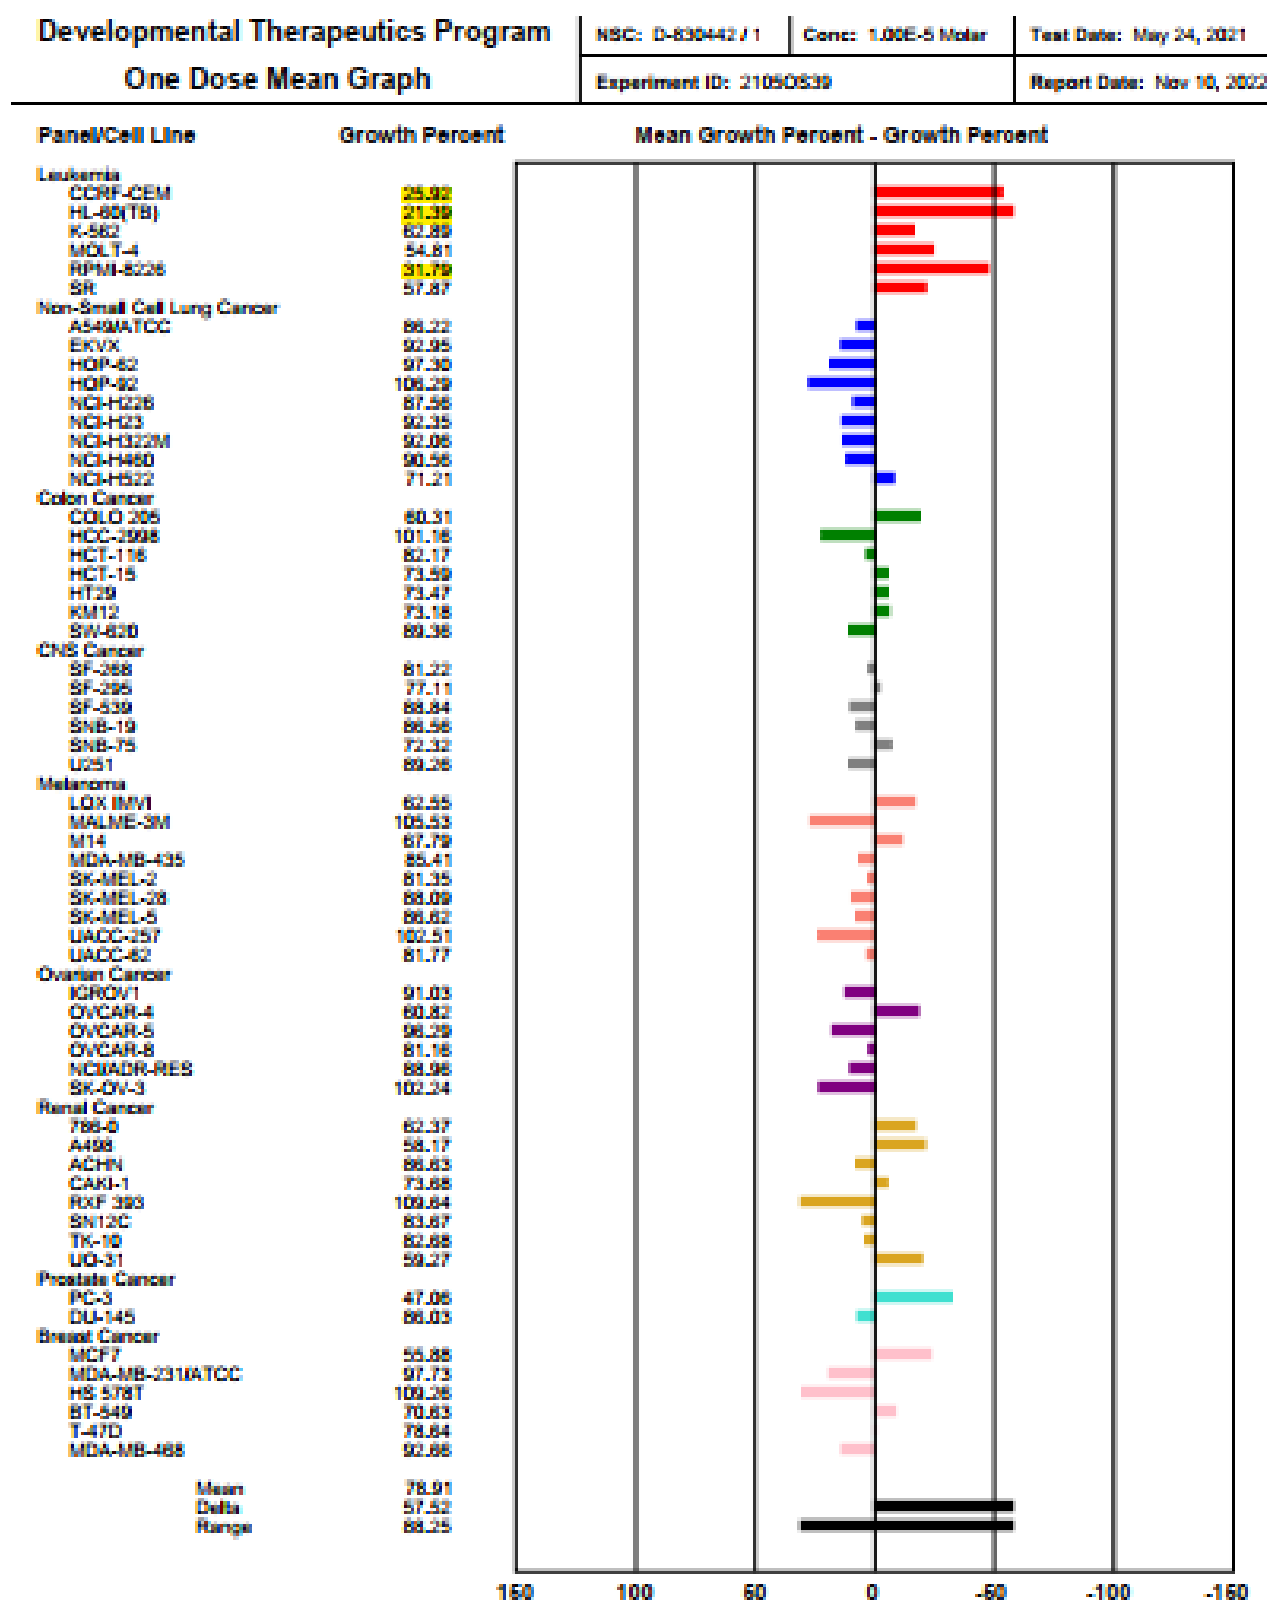

**Figure S38:** Results of primary *in vitro* one-dose anticancer assay of compound 3h.

Developmental Therapeutics Program  
One Dose Mean Graph

NSC: D-830480 / 1

Conc: 1.00E-5 Molar

Test Date: May 24, 2021

Experiment ID: 21050539

Report Date: Nov 03, 2022

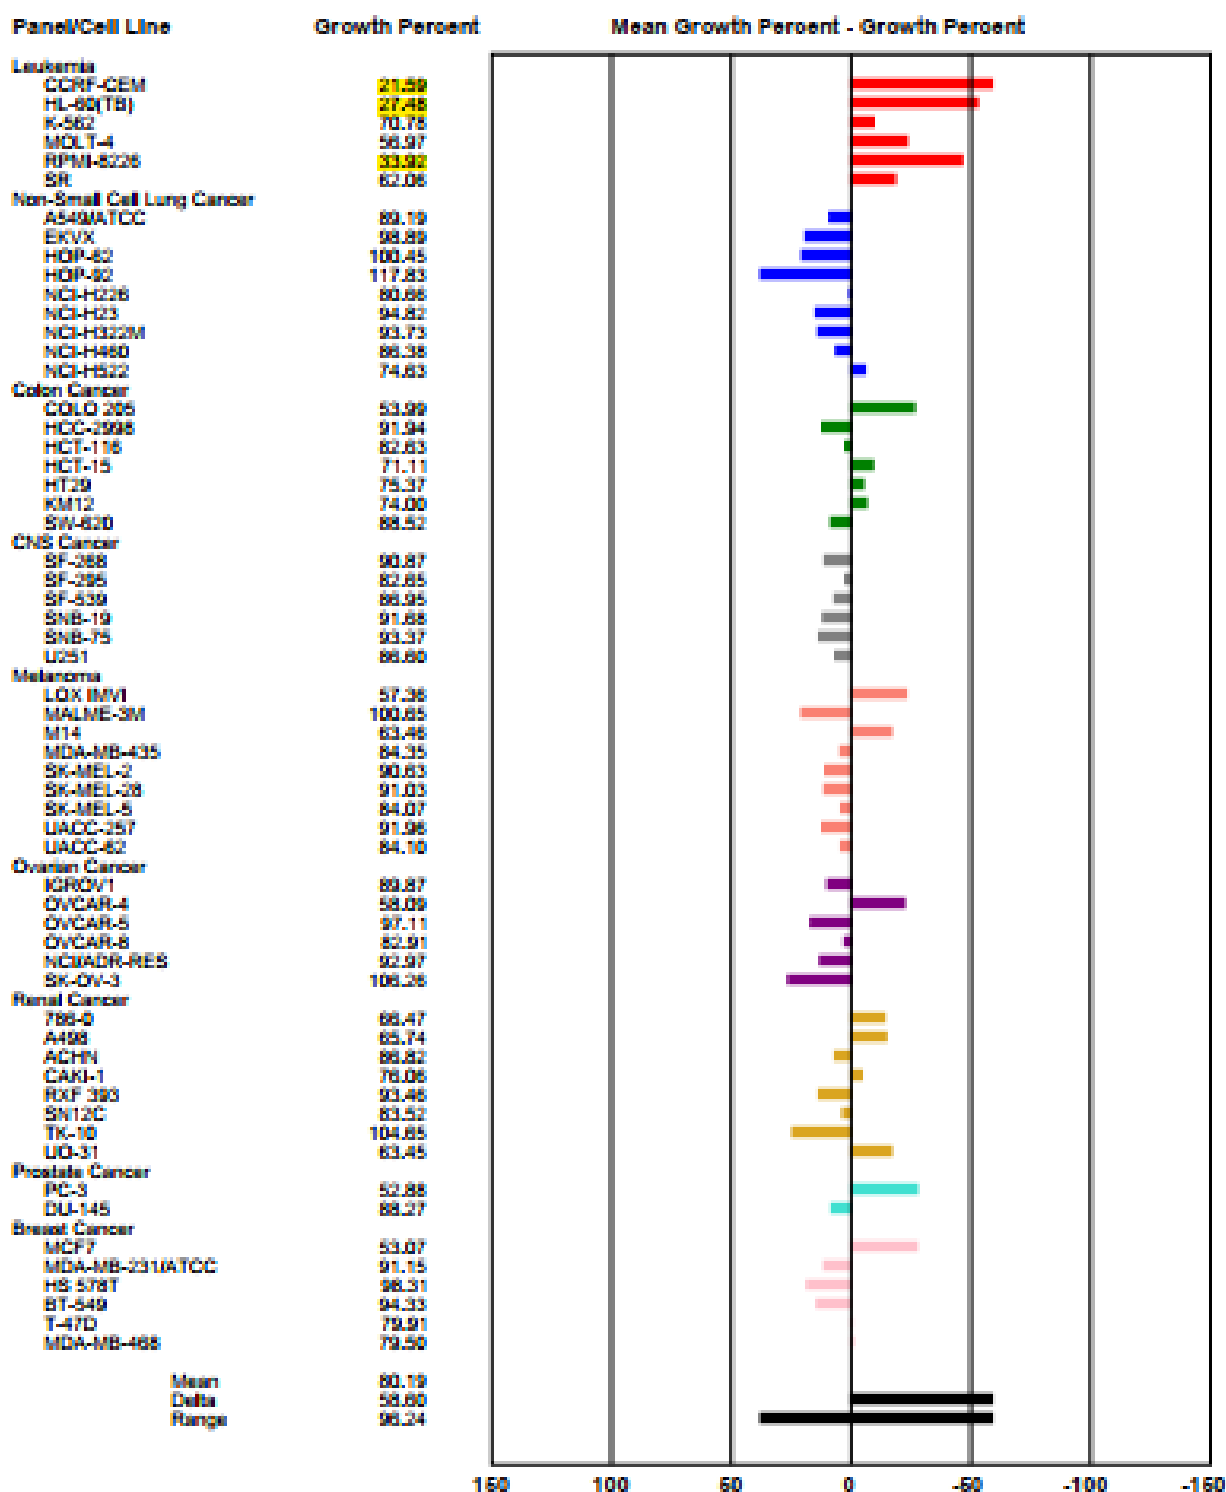

Figure S39: Results of primary *in vitro* one-dose anticancer assay of compound **3i**.

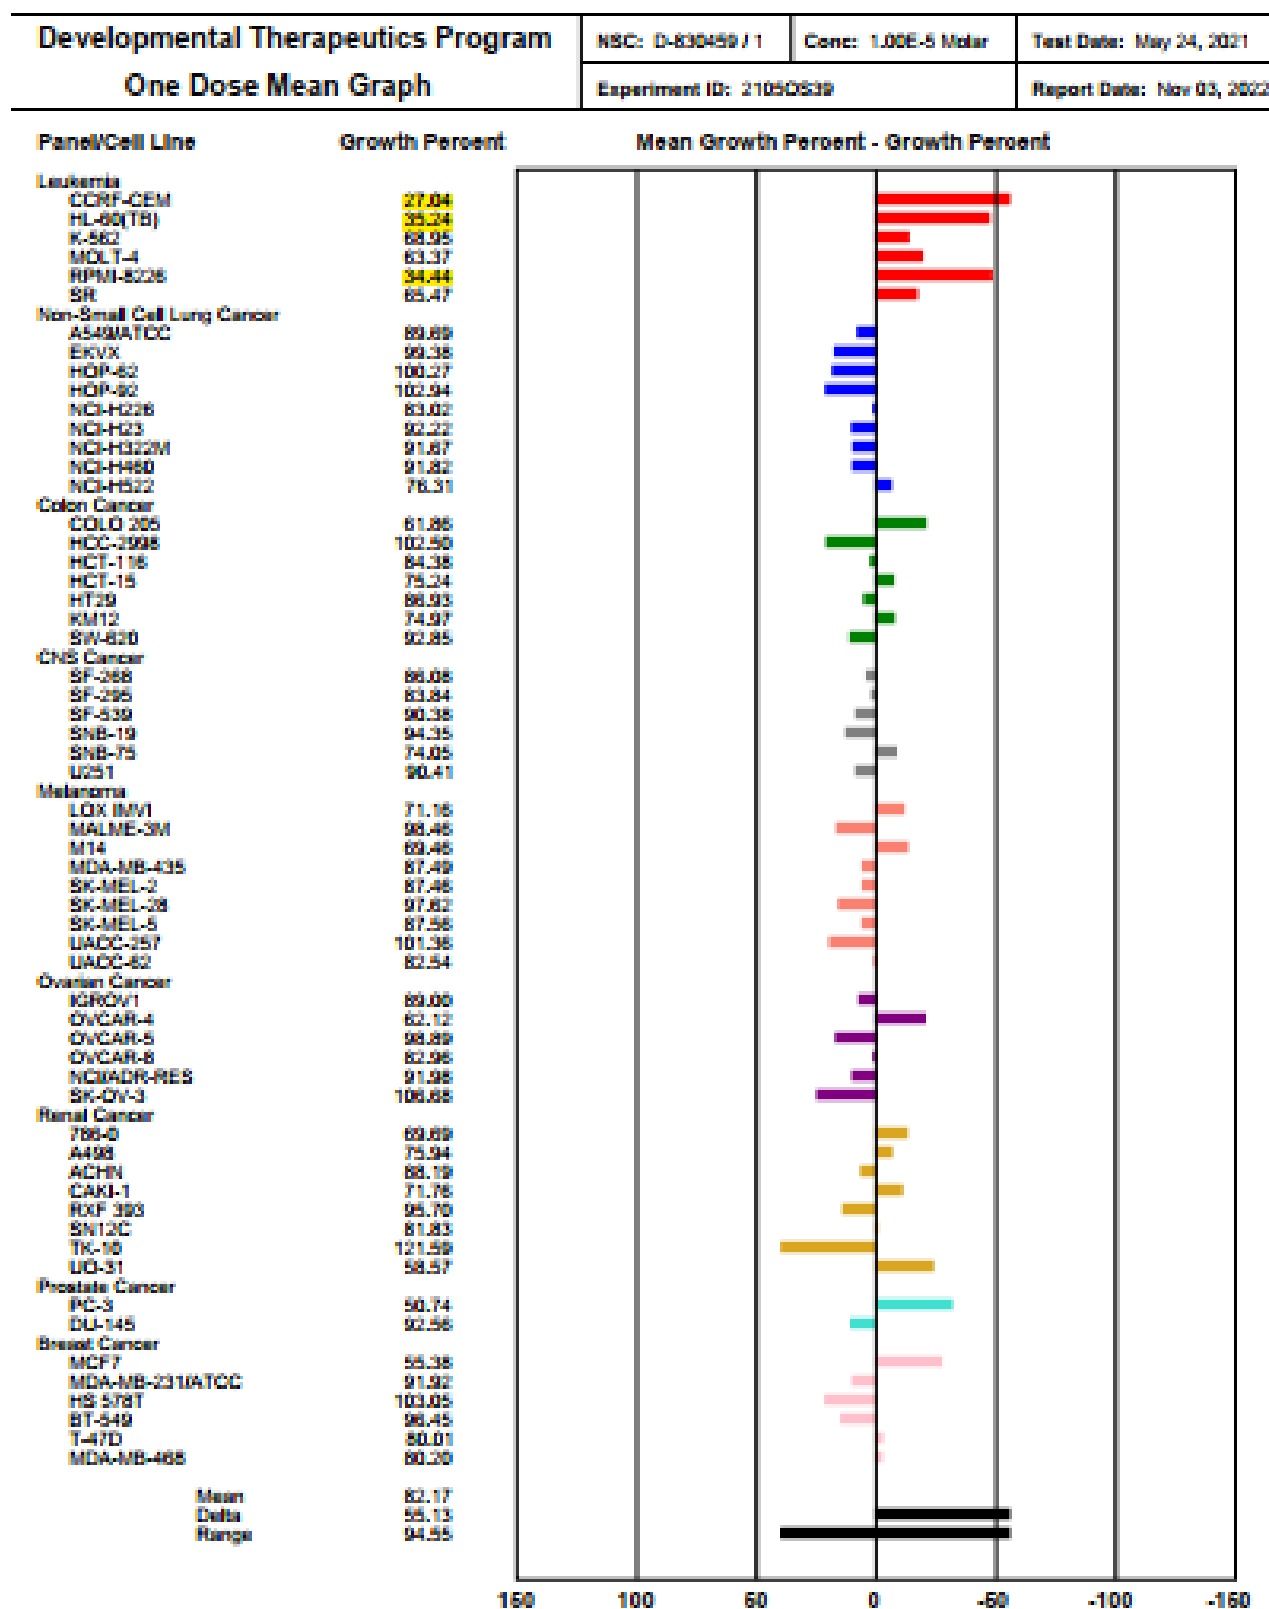

Figure S40: Results of primary *in vitro* one-dose anticancer assay of compound 3j.

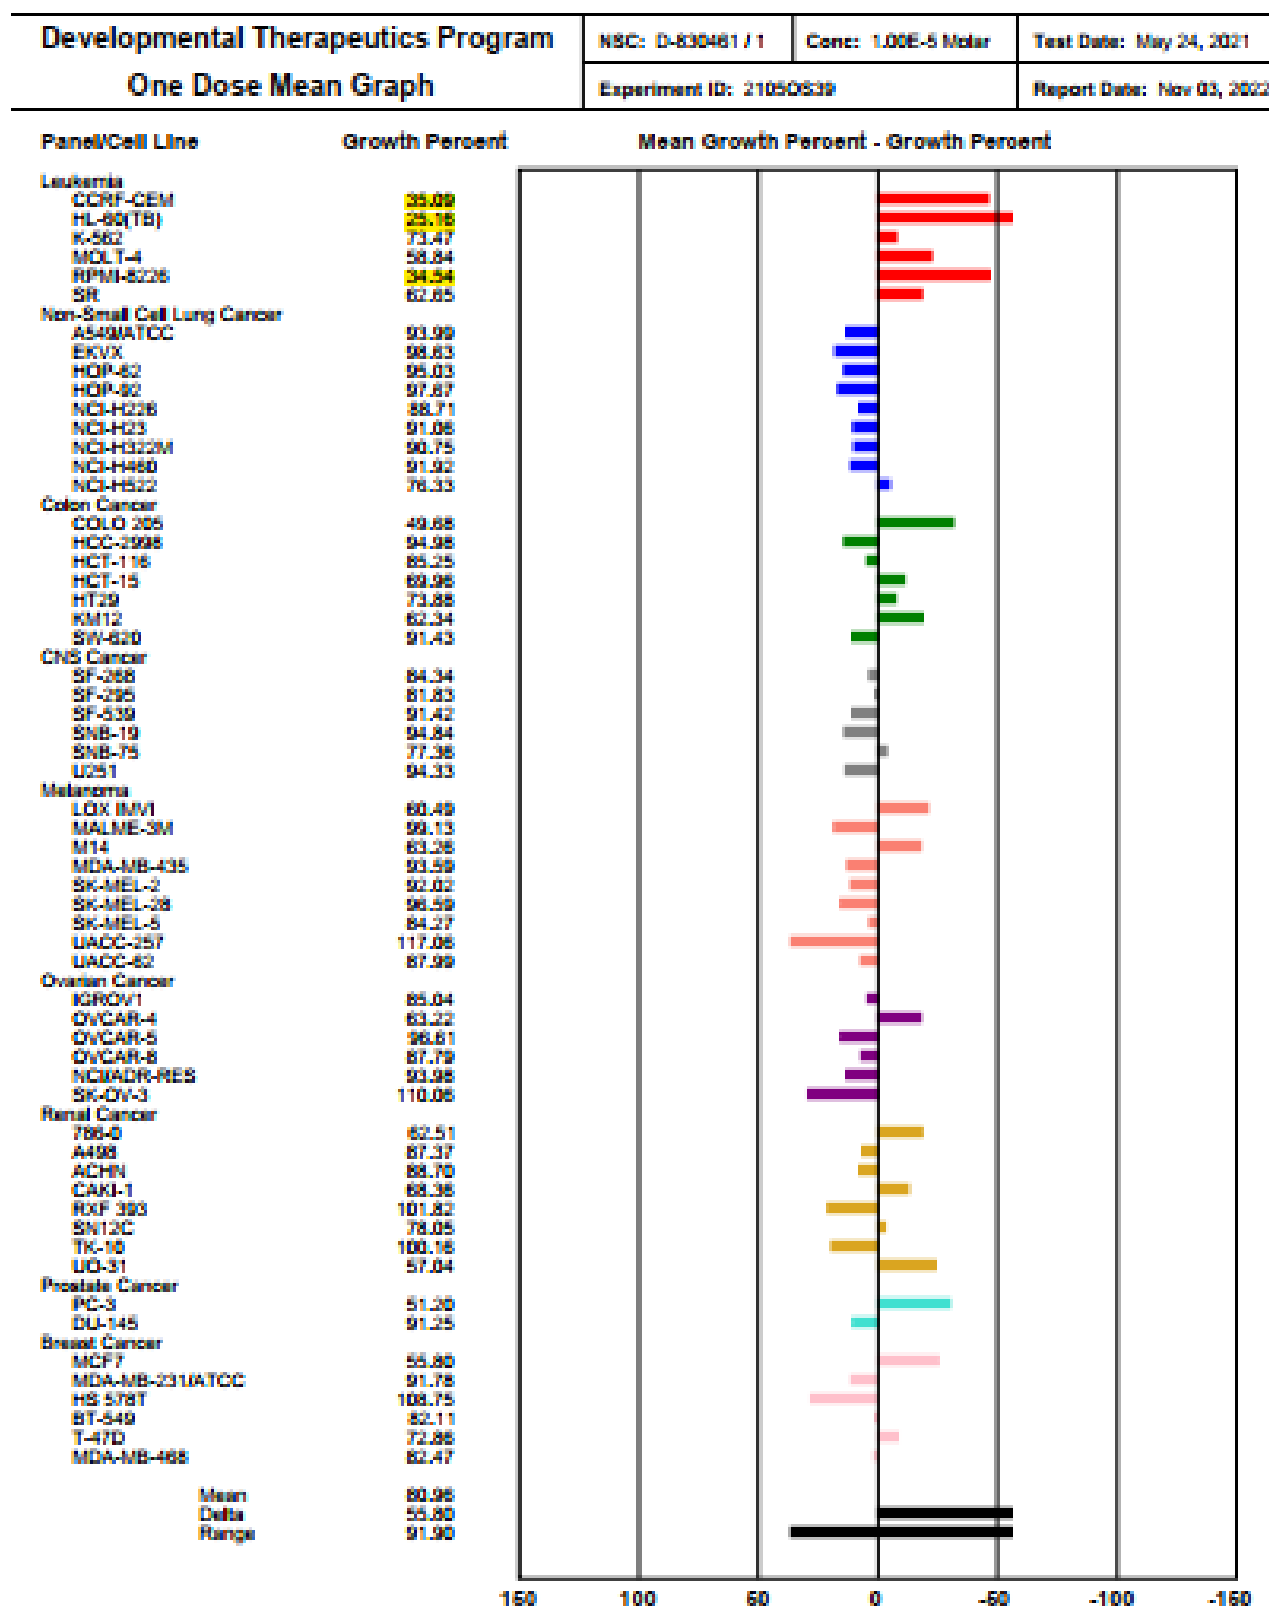

**Figure S41:** Results of primary *in vitro* one-dose anticancer assay of compound **3k**.

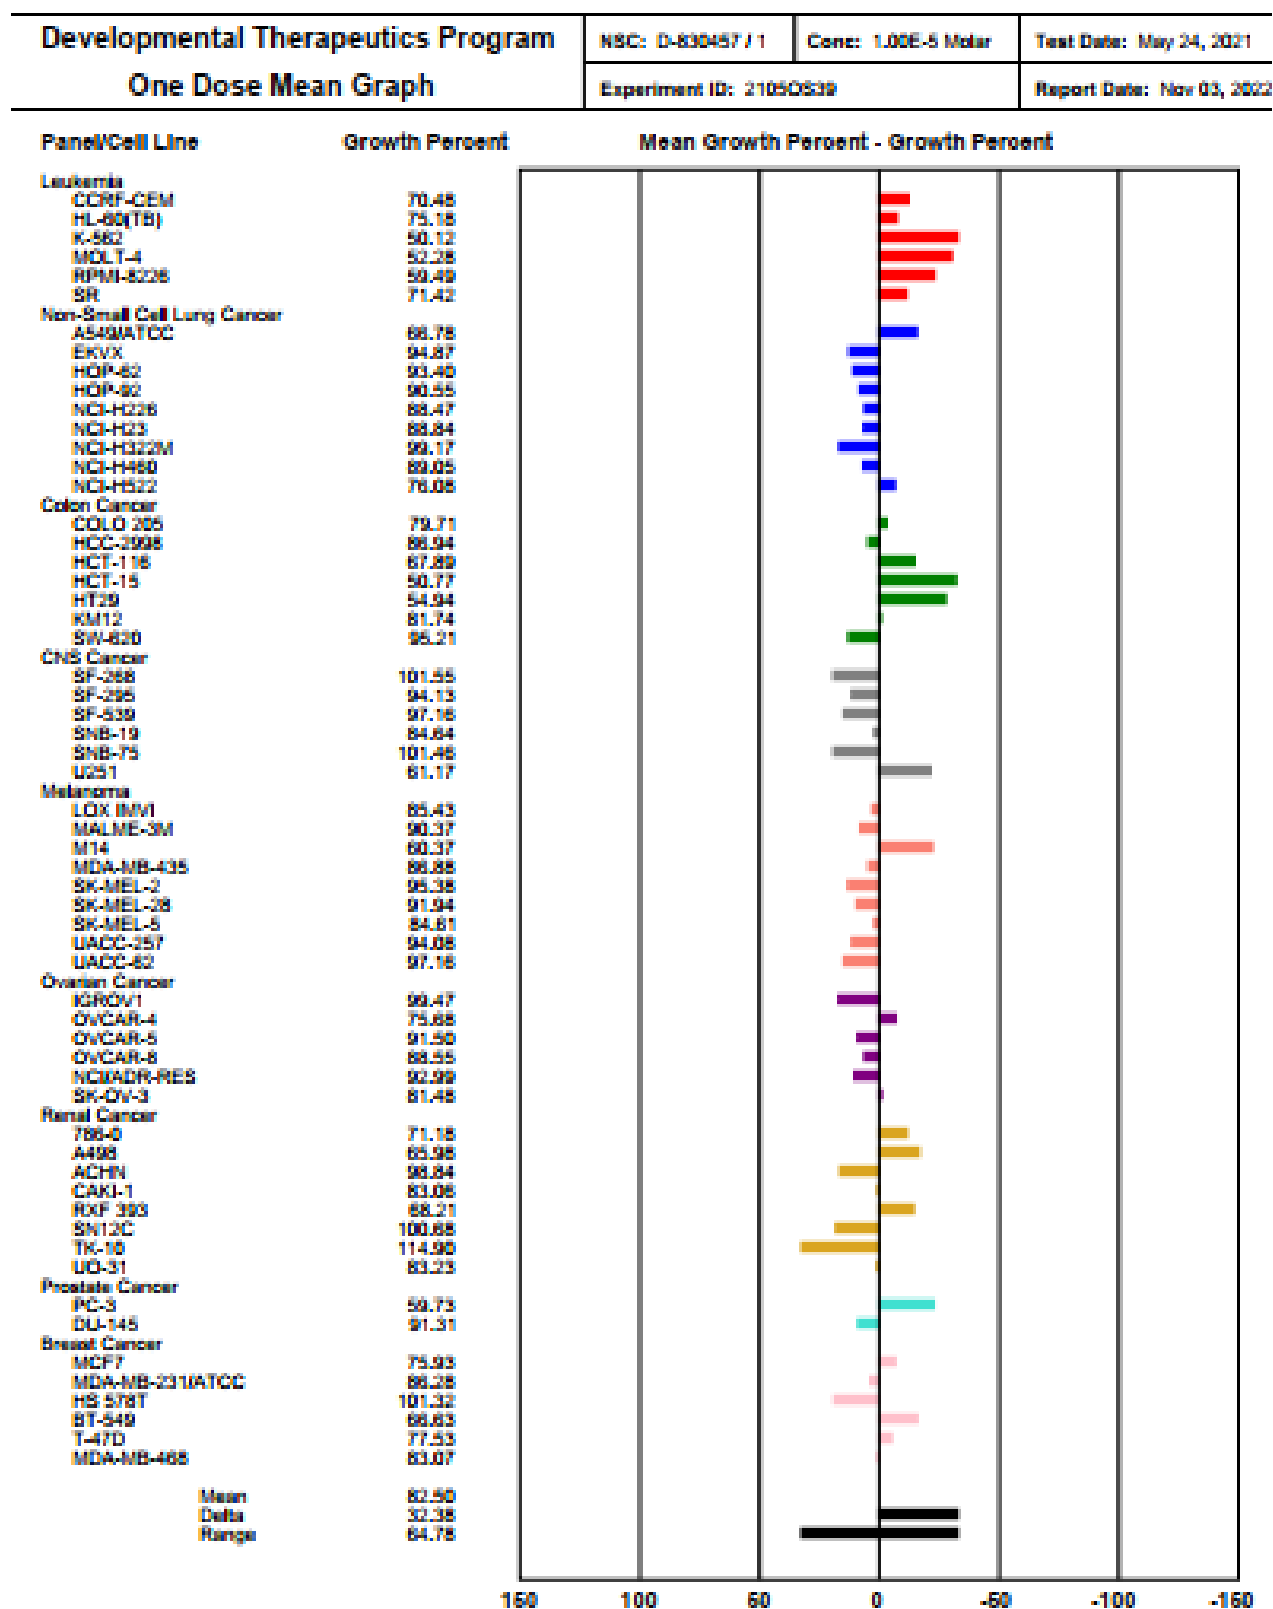

Figure S42: Results of primary *in vitro* one-dose anticancer assay of compound 3l.

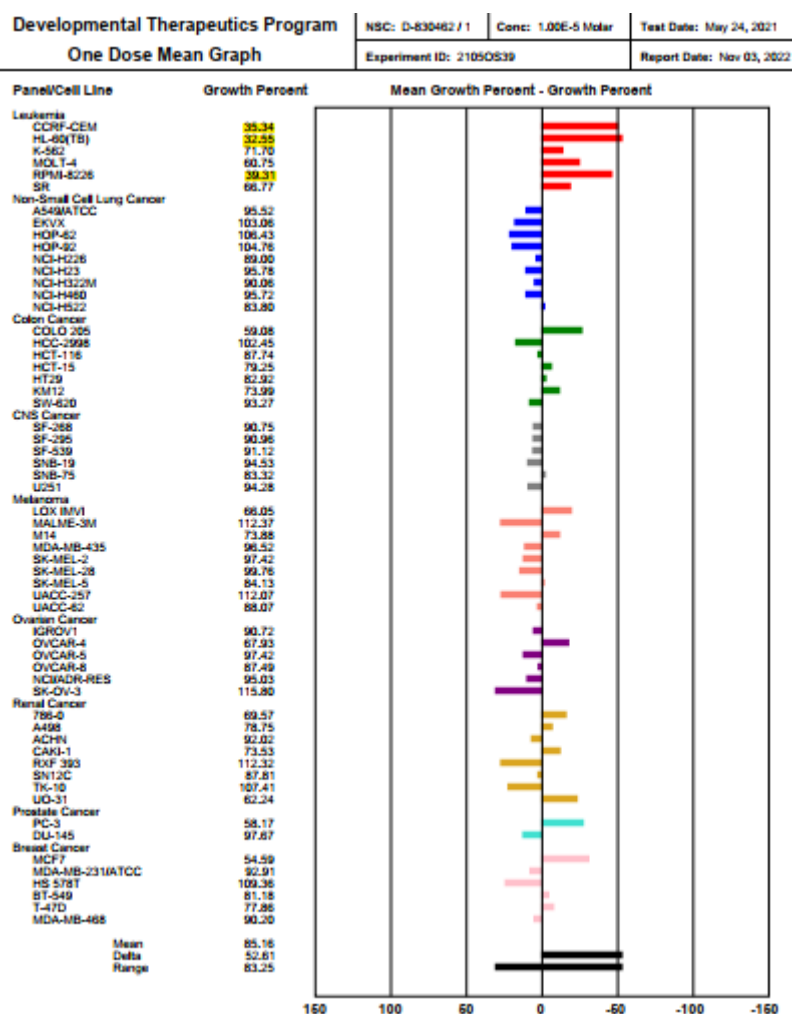

**Figure S43:** Results of primary *in vitro* one-dose anticancer assay of compound **3m**.

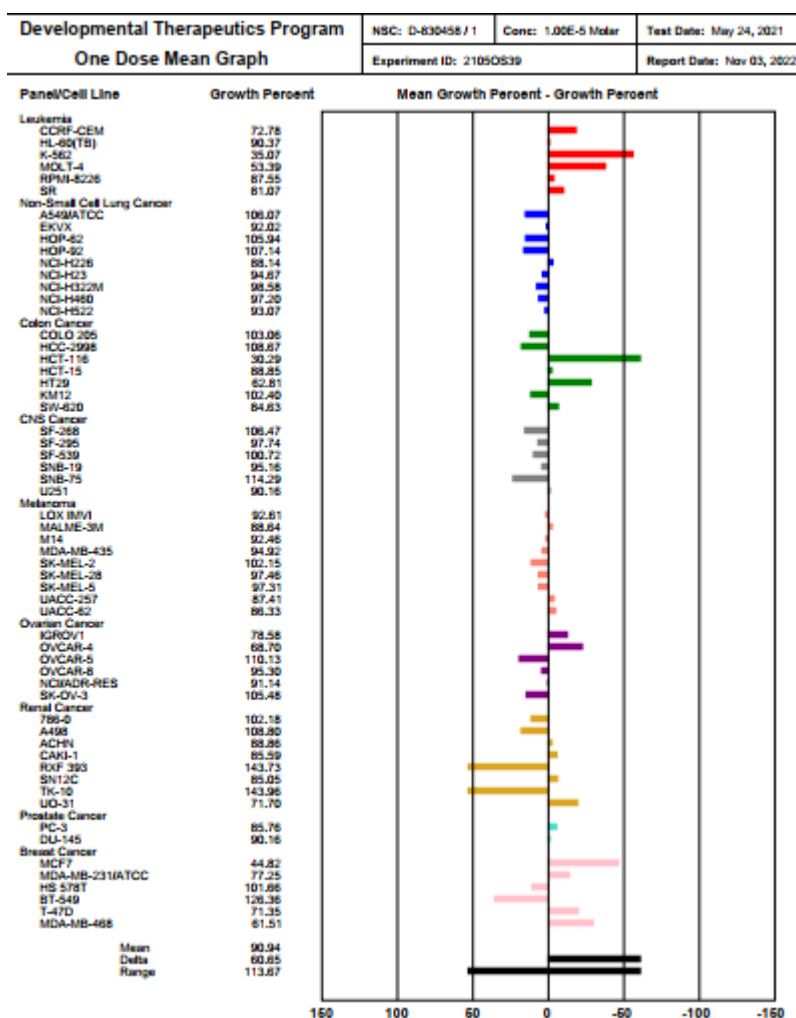

**Figure S44:** Results of primary *in vitro* one-dose anticancer assay of compound **3n**.

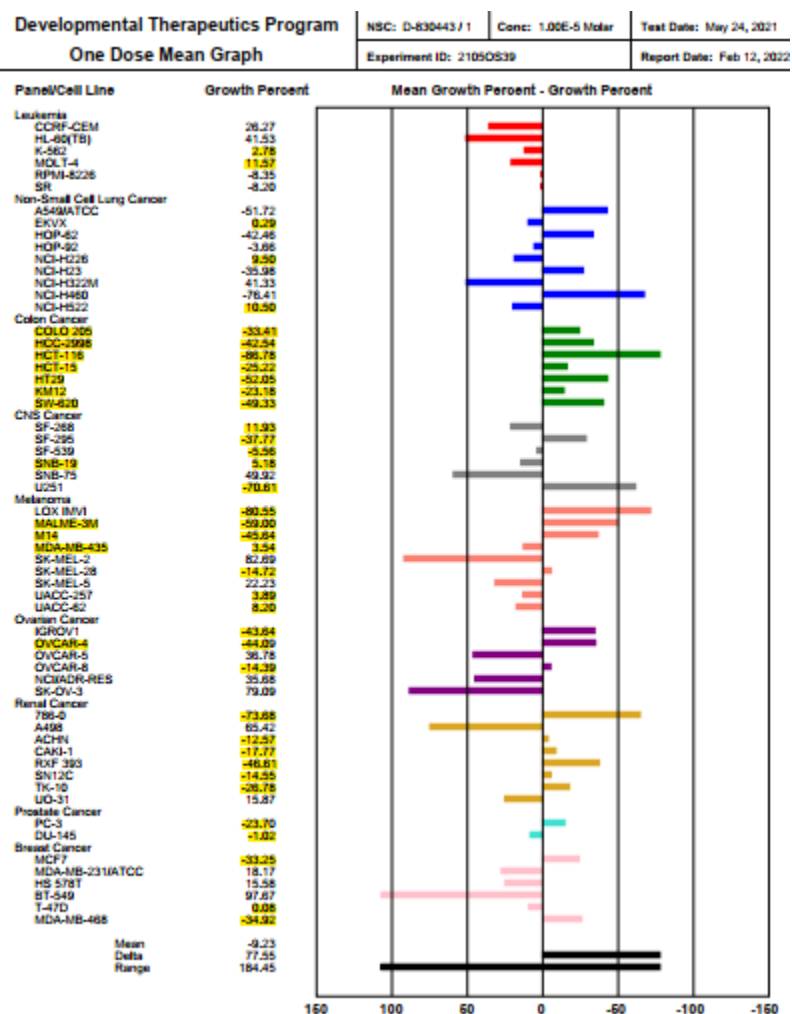

**Figure S45:** Results of primary *in vitro* one-dose anticancer assay of compound **30**.

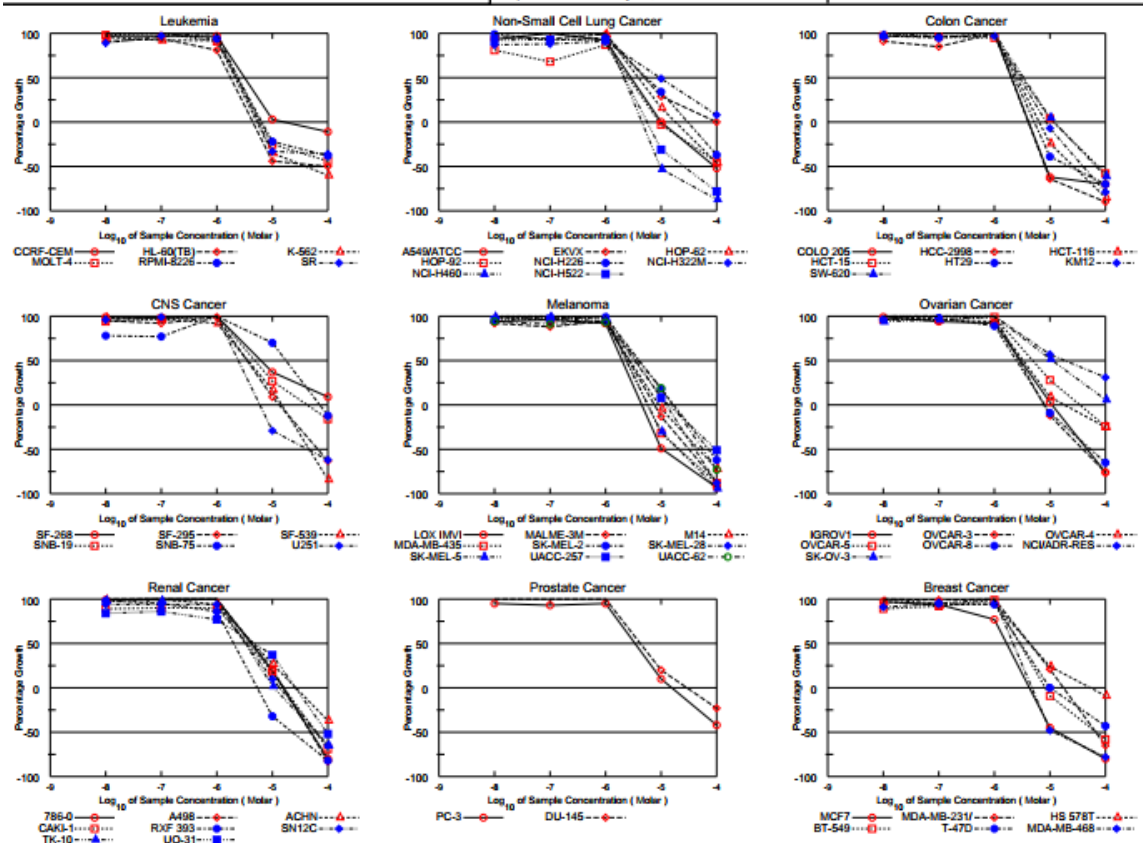

**Figure S46:** Dose response curve of the *in vitro* NCI five dose anticancer assay of compound 3c.

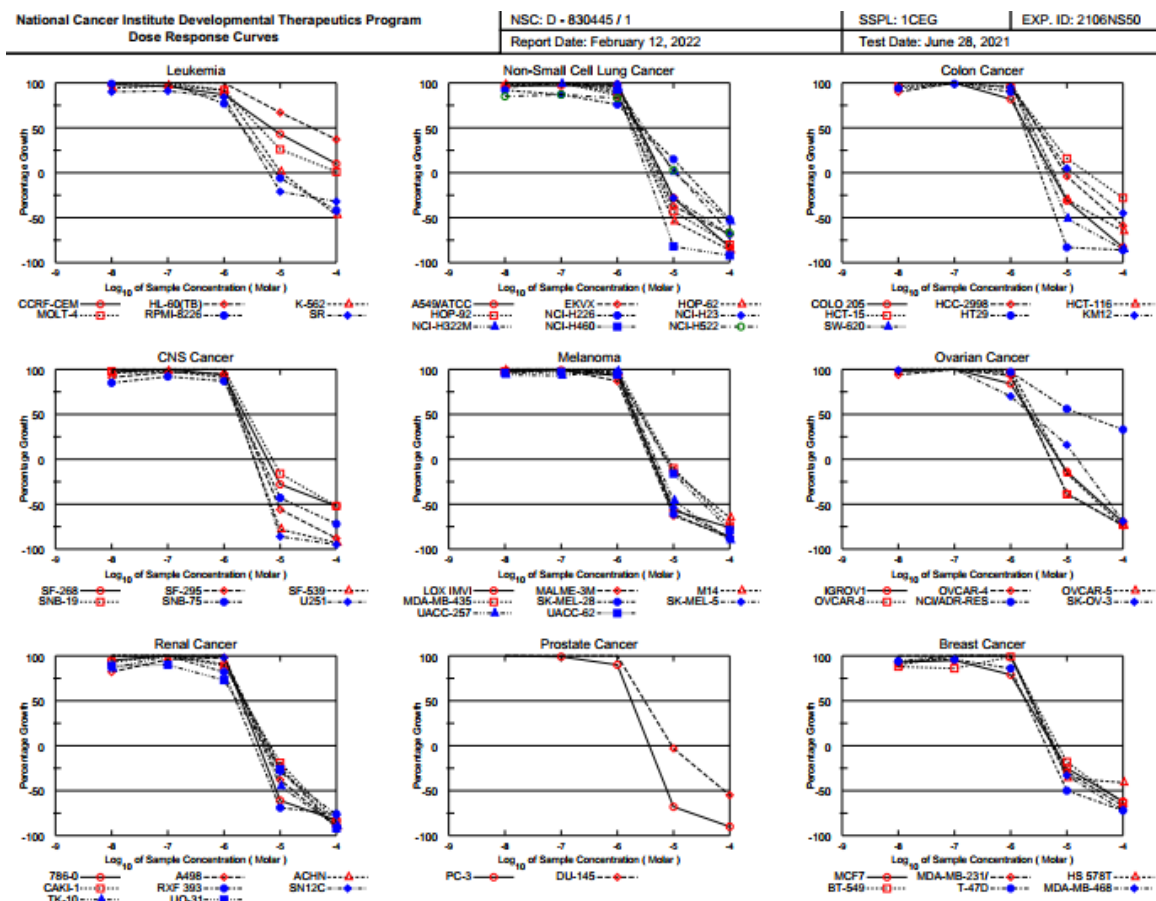

**Figure S47:** Dose response curve of the *in vitro* NCI five dose anticancer assay of compound **3e**.

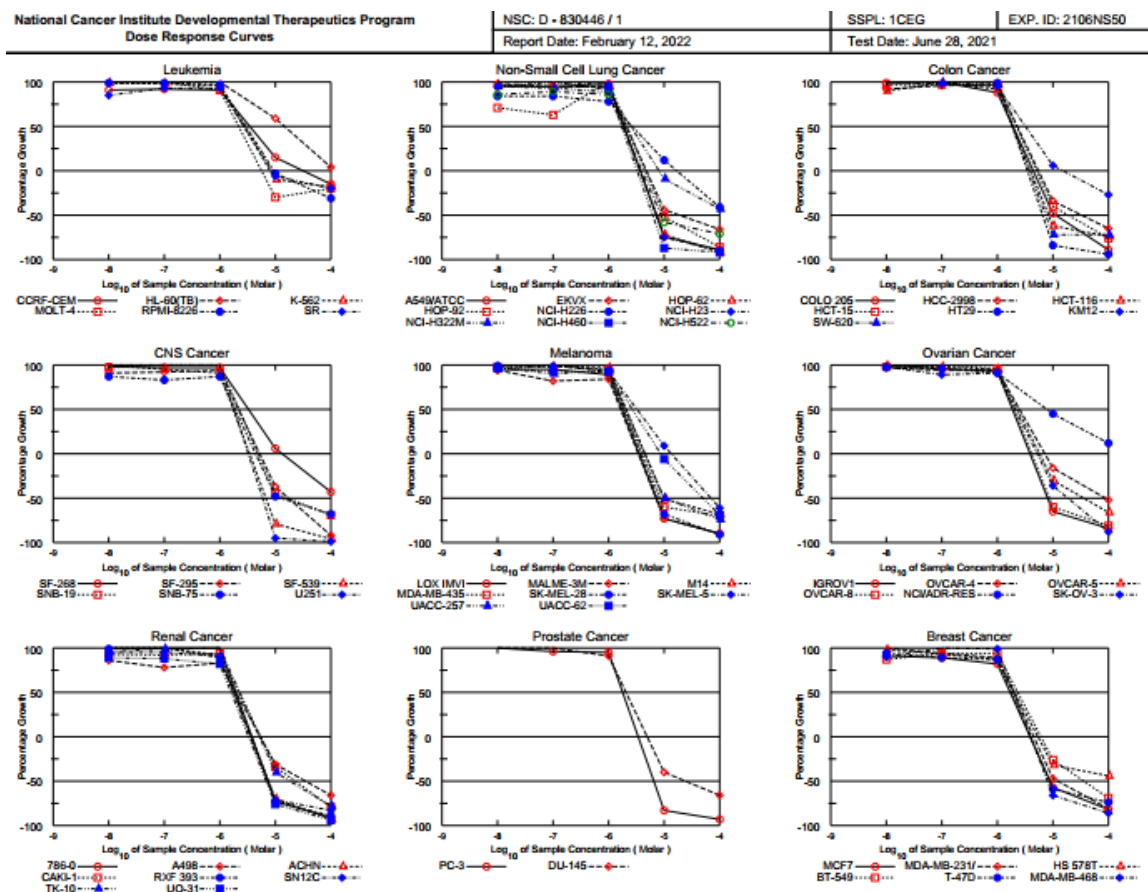

**Figure S48:** Dose response curve of the *in vitro* NCI five dose anticancer assay of compound **3g**.

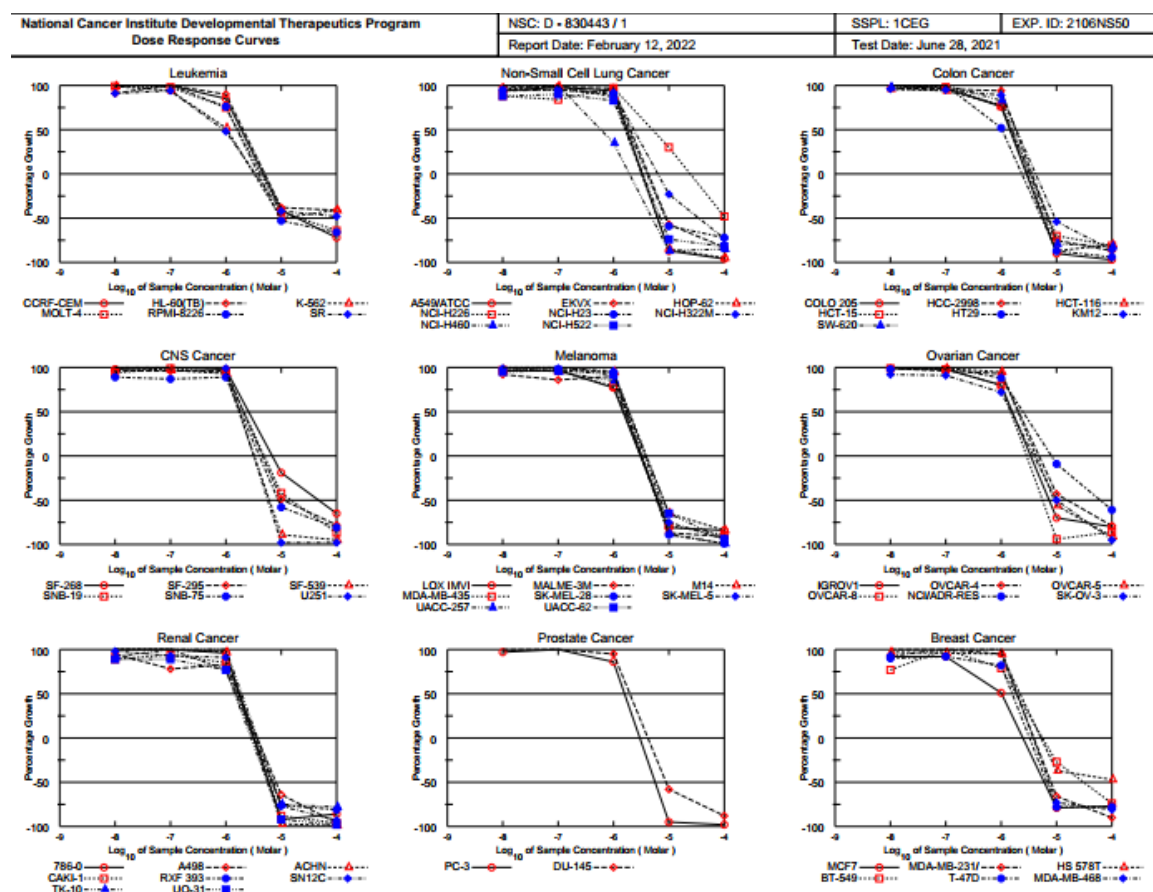

**Figure S49:** Dose response curve of the *in vitro* NCI five dose anticancer assay of compound **30**.

## Appendix A

### 4.2. Biological studies

#### 4.1.1. Cytotoxic activity evaluation against lung cancer cell lines

To determine IC<sub>50</sub>, benzimidazole molecules **3c**, **3e**, **3g** and **3o** were further analyzed using the standard MTT colorimetric assay against lung cancer A549 and NCI-H460 cell lines. Cells at density of  $1 \times 10^4$  were seeded in a 96-well plate at 37 °C for 24 h under 5% CO<sub>2</sub>. After incubation, the cells were treated with different concentrations of the test compounds **3c**, **3e**, **3g** and **3o** and incubated for 24 h, then 20 µl of MTT solution at 5 mg/mL was applied and incubated for 4 h at 37 °C. Dimethyl sulphoxide (DMSO) in volume of 100 µl was added to each well to dissolve the purple formazan that had formed. The color intensity of the formazan product, which represents the growth condition of the cells, is quantified by using an ELISA plate reader (EXL 800, USA) at 570 nm absorbance. The experimental conditions were carried out with at least three replicates, and the experiments were repeated at least three times.

#### 4.2.2. VEGFR-2 inhibition assay

Benzimidazole compounds **3e**, **3g** and Sorafenib were evaluated for their VEGFR-2 inhibitory activity according to manufacturer's instructions using # VEGFR-2 (KDR) Kinase Assay Kit Catalog # 40325 (BPS Bioscience).

#### 4.2.3. Cell cycle analysis of compounds **3e** and **3g**

Cell cycle analysis in NCI-H460 cells was investigated using fluorescent Annexin V-FITC/ PI detection kit (*BioVision EZCell*<sup>TM</sup> Cell Cycle Analysis Kit Catalog #K920) by flow cytometry assay. NCI-H460 cells at a density of  $2 \times 10^5$  per well were harvested and washed twice in PBS. After that, the cells were incubated at 37 °C and 5% CO<sub>2</sub>. The medium was incubated with the tested compounds **3e** and **3g** at their IC<sub>50</sub> (µM) for 24 h, washed twice in PBS, fixed with 70% ethanol, rinsed again with PBS. Afterward,

medium was stained with DNA fluorochrome PI for 15 min at 37 °C. The samples were immediately analyzed using FACS Calibur flow cytometer (Becton and Dickinson, Heidelberg, Germany).

#### **4.2.4. Apoptosis assay for compounds **3e** and **3g****

Apoptosis in NCI-H460 cells was investigated using fluorescent Annexin V-FITC/ PI detection kit (*BioVision* Annexin V-FITC Apoptosis Detection Kit, Catalog #: K101) by flow cytometry assay. NCI-H460 cells at a density of  $2 \times 10^5$  per well were treated with compounds **3e** and **3g** at their IC<sub>50</sub> (μM) for 24 h, then the cells were harvested and stained with Annexin V-FITC/ PI dye for 15 min in the dark at 37 °C. The samples were immediately analyzed using *FACS Calibur* flow cytometer (Becton and Dickinson, Heidelberg, Germany).

#### **4.2.5. Caspase 9 assay for compounds **3e** and **3g****

To determine the effect of the synthesized benzimidazole hybrids **3e** and **3g** on apoptosis, the active caspase 9 level was measured using ELISA analysis according to manufacturer's instructions. Briefly, NCI-H460 cells at a density of  $2 \times 10^4$  per well were treated with compounds **3e** and **3g** at their IC<sub>50</sub> (μM) for 24 h, then the cells were lysed with cell extraction buffer. This lysate was diluted in standard diluent buffer over the range of the assay. The optical density of each well was determined within 30 min using a microplate plate reader set at 450 nm to determine the human active caspase 9 level.

#### **4.2.6. Molecular modeling study**

Docking studies, calculations, and investigations was conducting using Molecular Operating Environment MOE version MOE (2021.01.01 Chemical Computing Group, Canada Software) to perform molecular modeling study. Structure of **3g** was built in database of MOE. The X-ray crystal structure of Sorafenib bound to the VEGFR-2

enzyme binding site (PDB ID: 4ASD) active site was acquired from protein data bank at research collaboration for Structural Bioinformatics (RSCB) protein database [PDB].
